# Supplementary material for: Iodine-mediated synthesis of (E)-vinyl sulfones from sodium sulfinates and cinnamic acids in aqueous medium
Source: Royal Society of Chemistry journal article supplement (doi:10.1039/c5ra10896a), 2015-01-01

## Supporting Information

### Iodine-mediated Synthesis of (*E*)-Vinyl Sulfones from Sodium Sulfinates and Cinnamic Acids in Aqueous Medium

Jian Gao, Junyi Lai and Gaoqing Yuan\*

*School of Chemistry and Chemical Engineering, South China University of Technology,*

*Guangzhou 510640, China*

*E-mail: gqyuan@scut.edu.cn*

|                                                                                   |    |
|-----------------------------------------------------------------------------------|----|
| <b>1. General Information.</b> .....                                              | S2 |
| <b>2. Synthesis of 4-methylbenzene-1-sulfonyl iodide</b> .....                    | S2 |
| <b>3. General Procedure for the Synthesis of (<i>E</i>)-Vinyl Sulfones.</b> ..... | S3 |
| <b>4. Analytical Data for All Products (3a–3t)</b> .....                          | S3 |
| <b>5. NMR Spectra for All Compounds.</b> .....                                    | S9 |

## 1. General Information.

Unless otherwise noted, all of solvents and reagents were used as received.  $^1\text{H}$  and  $^{13}\text{C}$  NMR spectra were recorded on a Bruker Advance 400 spectrometer ( $^1\text{H}$ : 400 MHz,  $^{13}\text{C}$ : 100 MHz). The chemical shifts were referenced to signals at 7.26 and 77.0 ppm, respectively. The following abbreviations were used to explain the multiplicities: s = singlet, d = doublet, t = triplet, q = quartet, m = multiplet. Mass spectra were recorded on a Shimadzu GCMS-QP5050A spectrometer at an ionization voltage of 70 eV equipped with a DB-WAX capillary column. GC-MS was obtained using electron ionization (EI). High-resolution mass spectra (ESI) were obtained with a LCMS-IT-TOF mass spectrometer.

## 2. Synthesis of 4-methylbenzene-1-sulfonyl iodide.<sup>1</sup>

Sodium 4-methylbenzenesulfinate (5 mmol, 0.89 g) was dissolved in 100 mL water at room temperature. Meanwhile, iodine (2.1 g) was dissolved in 10 mL alcohol at room temperature. Then, the sodium 4-methylbenzenesulfinate solution was added to the iodine solution gradually until a slight excess of iodine was present, and the yellow precipitate was generated continuously. The precipitate was filtered, washed with water, and dried at room temperature. Finally, 4-methylbenzene-1-sulfonyl iodide could be obtained.

MS spectrum of the prepared 4-methylbenzene-1-sulfonyl iodide was given in Figure S-1.

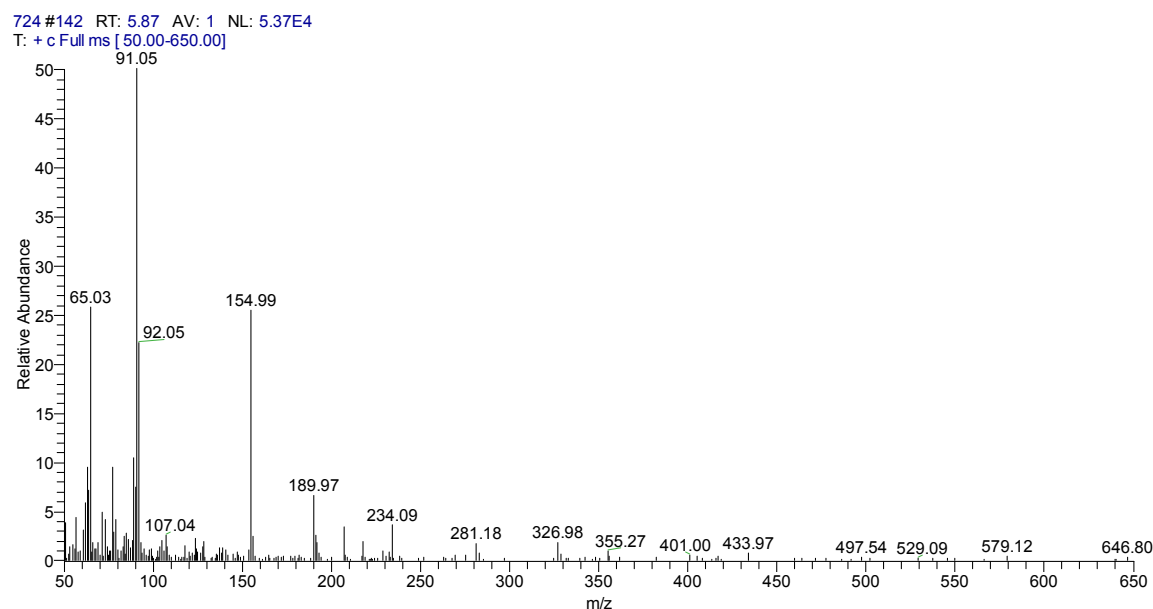

Figure S-1. MS spectrum of the prepared 4-methylbenzene-1-sulfonyl iodide

### 3. General Procedure for the Synthesis of (*E*)-Vinyl Sulfones.

Trans-cinnamic acid **1a** (0.5 mmol), sodium 4-methylbenzenesulfinate **2a** (0.6 mmol), I<sub>2</sub> (1.0 equiv.), K<sub>2</sub>CO<sub>3</sub> (1.0 equiv.) and H<sub>2</sub>O (2 mL) were added to a 10 mL glass tube at 60 °C under continuously stirring for 10 h and monitored periodically by TLC. Then the aqueous solution was extracted with diethyl ether (3 × 5 mL) and dried by anhydrous MgSO<sub>4</sub>. The solvent was removed under reduced pressure by an aspirator, and the crude product was purified by silica gel column chromatography using petroleum ether and ethyl acetate (5:1) as eluent to give the pure product **3a**.

### 4. Analytical Data for All Products (3a–3t).

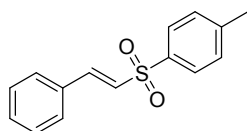

**(*E*)-1-methyl-4-(styrylsulfonyl)benzene (3a).**<sup>2</sup> Pale Yellow solid, <sup>1</sup>H NMR (400 MHz, CDCl<sub>3</sub>) δ 7.83 (d, *J* = 7.4 Hz, 2H), 7.66 (d, *J* = 15.3 Hz, 1H), 7.46 – 7.33 (m, 7H), 6.85 (d, *J* = 15.3 Hz, 1H), 2.43 (s, 3H). <sup>13</sup>C NMR (100 MHz, CDCl<sub>3</sub>) δ 144.4, 142.0, 137.8, 132.5, 131.1, 130.0, 129.1, 128.5, 127.7, 127.7, 21.6.

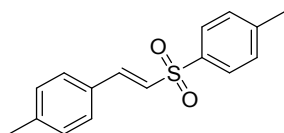

**(*E*)-1-methyl-4-((4-methylstyryl)sulfonyl)benzene (3b).**<sup>3</sup> Pale Yellow solid, <sup>1</sup>H NMR (400 MHz, CDCl<sub>3</sub>) δ 7.82 (d, *J* = 7.5 Hz, 2H), 7.62 (d, *J* = 15.3 Hz, 1H), 7.39 – 7.30 (m, 4H), 7.18 (d, *J* = 7.5 Hz, 2H), 6.79 (d, *J* = 15.3 Hz, 1H), 2.43 (s, 3H), 2.36 (s, 3H). <sup>13</sup>C NMR (100 MHz, CDCl<sub>3</sub>) δ 144.3, 142.0, 141.7, 138.0, 129.9, 129.8, 129.7, 128.5, 127.7, 126.5, 21.6, 21.5.

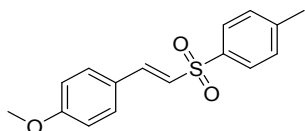

**(*E*)-1-methoxy-4-(2-tosylvinyl)benzene (3c).**<sup>4</sup> White solid, <sup>1</sup>H NMR (400 MHz, CDCl<sub>3</sub>) δ 7.81 (d, *J* = 7.2 Hz, 2H), 7.60 (d, *J* = 15.3 Hz, 1H), 7.41 (d, *J* = 7.4 Hz, 2H), 7.32 (d, *J* = 7.4 Hz, 2H), 6.89 (d, *J* = 7.4 Hz, 2H), 6.71 (d, *J* = 15.3 Hz, 1H), 3.82 (s, 3H), 2.42 (s, 3H). <sup>13</sup>C NMR (100 MHz, CDCl<sub>3</sub>) δ 162.0, 144.1, 141.8, 138.2, 130.3, 129.9, 127.6, 125.1, 124.9, 114.5, 55.4, 21.6.

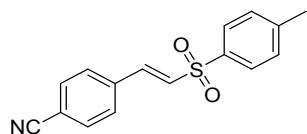

**(E)-4-(2-tosylvinyl)benzonitrile (3d).**  $^1\text{H NMR}$  (400 MHz,  $\text{CDCl}_3$ )  $\delta$  7.83 (d,  $J = 7.4$  Hz, 2H), 7.79 – 7.45 (m, 5H), 7.37 (d,  $J = 7.5$  Hz, 2H), 6.96 (d,  $J = 15.5$  Hz, 1H), 2.45 (s, 3H).  $^{13}\text{C NMR}$  (100 MHz,  $\text{CDCl}_3$ )  $\delta$  145.0, 139.2, 136.9, 136.8, 132.8, 131.4, 130.2, 128.9, 127.9, 118.0, 114.2, 21.7. ESI-HRMS calcd for  $\text{C}_{16}\text{H}_{13}\text{NNaO}_2\text{S}$   $[\text{M}+\text{Na}]^+$  306.0565, found 306.0559.

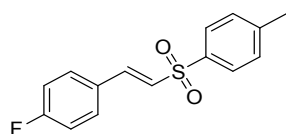

**(E)-1-fluoro-4-(2-tosylvinyl)benzene (3e).**<sup>2</sup> Colourless oil,  $^1\text{H NMR}$  (400 MHz,  $\text{CDCl}_3$ )  $\delta$  7.83 (d,  $J = 7.6$  Hz, 2H), 7.62 (d,  $J = 15.4$  Hz, 1H), 7.53 – 7.43 (m, 2H), 7.33 (d,  $J = 7.6$  Hz, 2H), 7.06 (t,  $J = 8.0$  Hz, 2H), 6.83 (d,  $J = 15.4$  Hz, 1H), 2.42 (s, 3H).  $^{13}\text{C NMR}$  (100 MHz,  $\text{CDCl}_3$ )  $\delta$  165.5, 163.0, 144.5, 140.6, 137.7, 130.6, 130.6, 130.0, 128.8, 128.7, 127.7, 127.5, 127.5, 116.4, 116.2, 21.6.

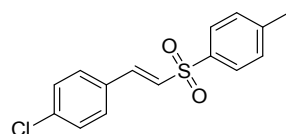

**(E)-1-chloro-4-(2-tosylvinyl)benzene (3f).**<sup>3</sup> White solid,  $^1\text{H NMR}$  (400 MHz,  $\text{CDCl}_3$ )  $\delta$  7.82 (d,  $J = 7.2$  Hz, 2H), 7.60 (d,  $J = 15.3$  Hz, 1H), 7.37 (dd,  $J = 23.0, 6.6$  Hz, 6H), 6.85 (d,  $J = 15.4$  Hz, 1H), 2.43 (s, 3H).  $^{13}\text{C NMR}$  (100 MHz,  $\text{CDCl}_3$ )  $\delta$  144.6, 140.4, 137.5, 137.1, 131.0, 130.1, 129.7, 129.4, 128.3, 127.8, 21.6.

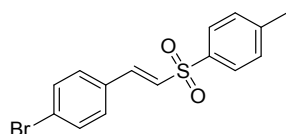

**(E)-1-bromo-4-(2-tosylvinyl)benzene (3g).**<sup>2</sup> White solid,  $^1\text{H NMR}$  (400 MHz,  $\text{CDCl}_3$ )  $\delta$  7.82 (d,  $J = 7.6$  Hz, 2H), 7.58 (d,  $J = 15.5$  Hz, 1H), 7.52 (d,  $J = 7.8$  Hz, 2H), 7.34 (d,  $J = 13.6$  Hz, 4H), 6.85 (d,  $J = 15.4$  Hz, 1H), 2.44 (s, 3H).  $^{13}\text{C NMR}$  (100 MHz,  $\text{CDCl}_3$ )  $\delta$  144.6, 140.5, 137.5, 132.4, 131.4, 130.1, 129.9, 128.4, 127.8, 125.5, 21.6.

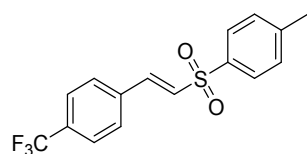

**(E)-1-methyl-4-((4-(trifluoromethyl)styryl)sulfonyl)benzene (3h).**<sup>5</sup> White solid, <sup>1</sup>H NMR (400 MHz, CDCl<sub>3</sub>) δ 7.84 (d, *J* = 7.4 Hz, 2H), 7.79 – 7.61 (m, 3H), 7.58 (d, *J* = 7.6 Hz, 2H), 7.36 (d, *J* = 7.6 Hz, 2H), 6.95 (d, *J* = 15.4 Hz, 1H), 2.44 (s, 3H). <sup>13</sup>C NMR (100 MHz, CDCl<sub>3</sub>) δ 144.8, 139.9, 137.2, 135.9, 132.7, 132.4, 130.4, 130.1, 128.7, 127.9, 126.1, 126.1, 126.0, 126.0, 122.3, 21.6.

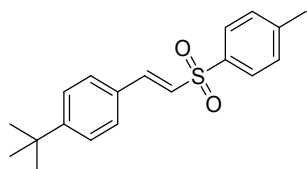

**(E)-1-(tert-butyl)-4-(2-tosylvinyl)benzene (3i).**<sup>5</sup> Pale yellow solid, <sup>1</sup>H NMR (400 MHz, CDCl<sub>3</sub>) δ 7.82 (d, *J* = 7.5 Hz, 2H), 7.64 (d, *J* = 15.3 Hz, 1H), 7.41 (d, *J* = 0.8 Hz, 4H), 7.32 (d, *J* = 7.6 Hz, 2H), 6.81 (d, *J* = 15.3 Hz, 1H), 2.42 (s, 3H), 1.30 (s, 9H). <sup>13</sup>C NMR (100 MHz, CDCl<sub>3</sub>) δ 154.9, 144.3, 142.0, 138.0, 129.9, 129.7, 128.4, 127.7, 126.6, 126.1, 35.0, 31.1, 21.6.

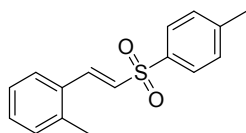

**(E)-1-methyl-2-(2-tosylvinyl)benzene (3j).**<sup>5</sup> Pale yellow solid, <sup>1</sup>H NMR (400 MHz, CDCl<sub>3</sub>) δ 7.93 (d, *J* = 15.3 Hz, 1H), 7.83 (d, *J* = 7.7 Hz, 2H), 7.41 (d, *J* = 7.5 Hz, 1H), 7.34 (d, *J* = 7.6 Hz, 2H), 7.27 (d, *J* = 7.4 Hz, 1H), 7.18 (dd, *J* = 15.3, 7.5 Hz, 2H), 6.77 (d, *J* = 15.3 Hz, 1H), 2.43 (s, 6H). <sup>13</sup>C NMR (100 MHz, CDCl<sub>3</sub>) δ 144.4, 139.6, 138.1, 137.8, 131.4, 131.0, 130.9, 130.0, 128.6, 127.7, 126.9, 126.5, 21.6, 19.8.

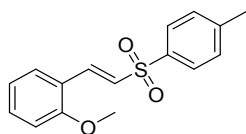

**(E)-1-methoxy-2-(2-tosylvinyl)benzene (3k).**<sup>2</sup> Colourless oil, <sup>1</sup>H NMR (400 MHz, CDCl<sub>3</sub>) δ 8.03 – 7.70 (m, 3H), 7.45 – 7.29 (m, 4H), 7.06 (d, *J* = 15.4 Hz, 1H), 6.93 (dd, *J* = 18.6, 8.2 Hz, 2H), 3.87 (s, 3H), 2.42 (s, 3H). <sup>13</sup>C NMR (100 MHz, CDCl<sub>3</sub>) δ 158.8, 144.0, 138.3, 138.0, 132.4, 130.7, 129.9, 128.3, 127.7, 121.3, 120.8, 111.3, 55.5, 21.6.

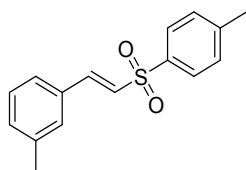

**(E)-1-methyl-3-(2-tosylvinyl)benzene (3l).**<sup>6</sup> Pale yellow solid, <sup>1</sup>H NMR (400 MHz, CDCl<sub>3</sub>) δ 7.82 (d, *J* = 7.7 Hz, 2H), 7.62 (d, *J* = 15.3 Hz, 1H), 7.33 (d, *J* = 7.7 Hz, 2H), 7.27 (d, *J* = 5.1 Hz, 4H), 6.83 (d, *J* = 15.4 Hz, 1H), 2.42 (s, 3H), 2.34 (s, 3H). <sup>13</sup>C NMR (100 MHz, CDCl<sub>3</sub>) δ 144.3, 142.1, 138.8, 137.9, 132.4, 131.9, 130.0, 129.1, 129.0, 127.7, 127.4, 125.8, 21.6, 21.3.

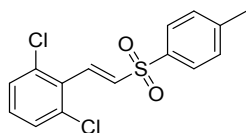

**(E)-1,3-dichloro-2-(2-tosylvinyl)benzene (3m).** Pale yellow solid, <sup>1</sup>H NMR (400 MHz, CDCl<sub>3</sub>) δ 7.83 (t, *J* = 11.5 Hz, 3H), 7.35 (t, *J* = 7.8 Hz, 4H), 7.21 (t, *J* = 7.9 Hz, 1H), 7.13 (d, *J* = 15.8 Hz, 1H), 2.44 (s, 3H). <sup>13</sup>C NMR (100 MHz, CDCl<sub>3</sub>) δ 144.7, 137.1, 135.8, 135.3, 135.3, 130.7, 130.1, 129.8, 129.0, 127.9, 21.7. ESI-HRMS calcd for C<sub>16</sub>H<sub>13</sub>Cl<sub>2</sub>NaO<sub>2</sub>S [M+Na]<sup>+</sup> 348.9831, found 348.9827.

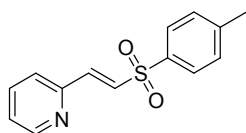

**(E)-2-(2-tosylvinyl)pyridine (3n).** Yellow oil, <sup>1</sup>H NMR (400 MHz, CDCl<sub>3</sub>) δ 8.75 - 8.41 (m, 1H), 7.84 (d, *J* = 6.8 Hz, 2H), 7.73 (t, *J* = 6.7 Hz, 1H), 7.62 (d, *J* = 14.9 Hz, 1H), 7.47 - 7.27 (m, 5H), 2.43 (s, 3H). <sup>13</sup>C NMR (100 MHz, CDCl<sub>3</sub>) δ 151.1, 150.3, 144.6, 140.0, 137.3, 137.1, 132.2, 130.0, 127.9, 125.4, 124.9, 21.6. ESI-HRMS calcd for C<sub>16</sub>H<sub>13</sub>Cl<sub>2</sub>O<sub>2</sub>S M<sup>+</sup> 260.0743, found 260.0740.

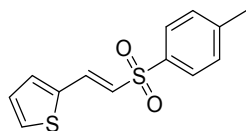

**(E)-2-(2-tosylvinyl)thiophene (3o).**<sup>4</sup> Brown solid, <sup>1</sup>H NMR (400 MHz, CDCl<sub>3</sub>) δ 7.81 (d, *J* = 7.4 Hz, 2H), 7.76 (d, *J* = 15.2 Hz, 1H), 7.42 (d, *J* = 3.9 Hz, 1H), 7.34 (d, *J* = 7.6 Hz, 2H), 7.28 (d, *J* = 11.0 Hz, 1H), 7.05 (t, *J* = 3.9 Hz, 1H), 6.64 (d, *J* = 15.1 Hz, 1H), 2.43 (s, 3H). <sup>13</sup>C NMR (100 MHz, CDCl<sub>3</sub>) δ 144.4, 137.9, 137.1, 134.6, 132.3, 130.0, 129.9, 128.3, 127.7, 125.9, 21.6.

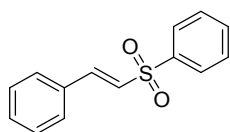

**(E)-2-(phenylsulfonyl)vinylbenzene (3p).**<sup>3</sup> Pale yellow solid, <sup>1</sup>H NMR (400 MHz, CDCl<sub>3</sub>) δ 7.96 (d, *J* = 7.3 Hz, 2H), 7.69 (d, *J* = 15.4 Hz, 1H), 7.64 - 7.57 (m, 1H), 7.53 (t, *J* = 7.3 Hz, 2H),

7.47 (d,  $J = 6.4$  Hz, 2H), 7.38 (d,  $J = 5.9$  Hz, 3H), 6.89 (d,  $J = 15.4$  Hz, 1H).  $^{13}\text{C}$  NMR (100 MHz,  $\text{CDCl}_3$ )  $\delta$  142.5, 140.8, 133.5, 132.4, 131.3, 129.4, 129.1, 128.6, 127.7, 127.4.

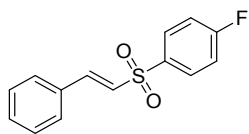

**(E)-1-fluoro-4-(styrylsulfonyl)benzene (3q).**<sup>2</sup> Colourless oil,  $^1\text{H}$  NMR (400 MHz,  $\text{CDCl}_3$ )  $\delta$  8.06 – 7.87 (m, 2H), 7.68 (d,  $J = 15.3$  Hz, 1H), 7.48 (d,  $J = 6.5$  Hz, 2H), 7.40 (d,  $J = 6.3$  Hz, 3H), 7.22 (t,  $J = 7.8$  Hz, 2H), 6.86 (d,  $J = 15.3$  Hz, 1H).  $^{13}\text{C}$  NMR (100 MHz,  $\text{CDCl}_3$ )  $\delta$  166.9, 164.4, 142.7, 136.9, 136.8, 132.3, 131.4, 130.6, 130.5, 129.1, 128.6, 127.2, 116.8, 116.6.

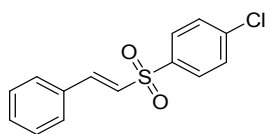

**(E)-1-chloro-4-(styrylsulfonyl)benzene (3r).**<sup>7</sup> White solid,  $^1\text{H}$  NMR (400 MHz,  $\text{CDCl}_3$ )  $\delta$  7.88 (d,  $J = 7.4$  Hz, 2H), 7.69 (d,  $J = 15.4$  Hz, 1H), 7.56 – 7.45 (m, 4H), 7.40 (d,  $J = 6.7$  Hz, 3H), 6.85 (d,  $J = 15.3$  Hz, 1H).  $^{13}\text{C}$  NMR (100 MHz,  $\text{CDCl}_3$ )  $\delta$  143.1, 140.1, 139.3, 132.2, 131.4, 129.7, 129.2, 128.7, 126.9.

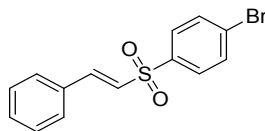

**(E)-1-bromo-4-(styrylsulfonyl)benzene (3s).**<sup>2</sup> White solid,  $^1\text{H}$  NMR (400 MHz,  $\text{CDCl}_3$ )  $\delta$  7.81 (d,  $J = 7.8$  Hz, 2H), 7.75 – 7.61 (m, 3H), 7.48 (d,  $J = 6.4$  Hz, 2H), 7.39 (d,  $J = 6.6$  Hz, 3H), 6.86 (d,  $J = 15.4$  Hz, 1H).  $^{13}\text{C}$  NMR (100 MHz,  $\text{CDCl}_3$ )  $\delta$  143.1, 139.8, 132.7, 132.2, 131.5, 129.2, 129.2, 128.7, 128.7, 126.9.

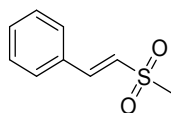

**(E)-2-(methylsulfonyl)vinylbenzene (3t).**<sup>7</sup> Yellow oil,  $^1\text{H}$  NMR (400 MHz,  $\text{CDCl}_3$ )  $\delta$  7.62 (d,  $J = 15.5$  Hz, 1H), 7.52 (d,  $J = 6.4$  Hz, 2H), 7.43 (d,  $J = 6.0$  Hz, 3H), 6.95 (d,  $J = 15.5$  Hz, 1H), 3.03 (s, 3H).  $^{13}\text{C}$  NMR (100 MHz,  $\text{CDCl}_3$ )  $\delta$  144.0, 132.1, 131.4, 129.2, 128.6, 126.3, 43.3.

## Reference:

- 1 M. Hong, Y. Li, B. Li and Y. Li, *Macromol. Rapid Commun.*, 2012, **33**, 998.
- 2 R. Q. Guo, Q. W. Gui and D. D. Wang, *Catal. Lett.*, 2014, **144**, 1377.
- 3 V. Nair, A. Augustine, T. G. George and L. G. Nair, *Tetrahedron Lett.*, 2001, **42**, 6763.
- 4 B. V. Rokade and K. R. Prabhu, *J. Org. Chem.*, 2014, **79**, 8110.
- 5 S. Tang, Y. Wu, W. Q. Liao, R. P. Bai, C. Liu and A. W. Lei, *Chem. Commun.*, 2014, **50**, 4496.
- 6 G. S. Deng and J. Y. Zou, *Arkivoc*, 2010, **2**, 186.
- 7 Y. L. Xu, X. T. Tang, W. G. Hu, W. Q. Wu and H. F. Jiang, *Green Chem.*, 2014, **16**, 3720.

## **5. NMR Spectra for All Compounds.**



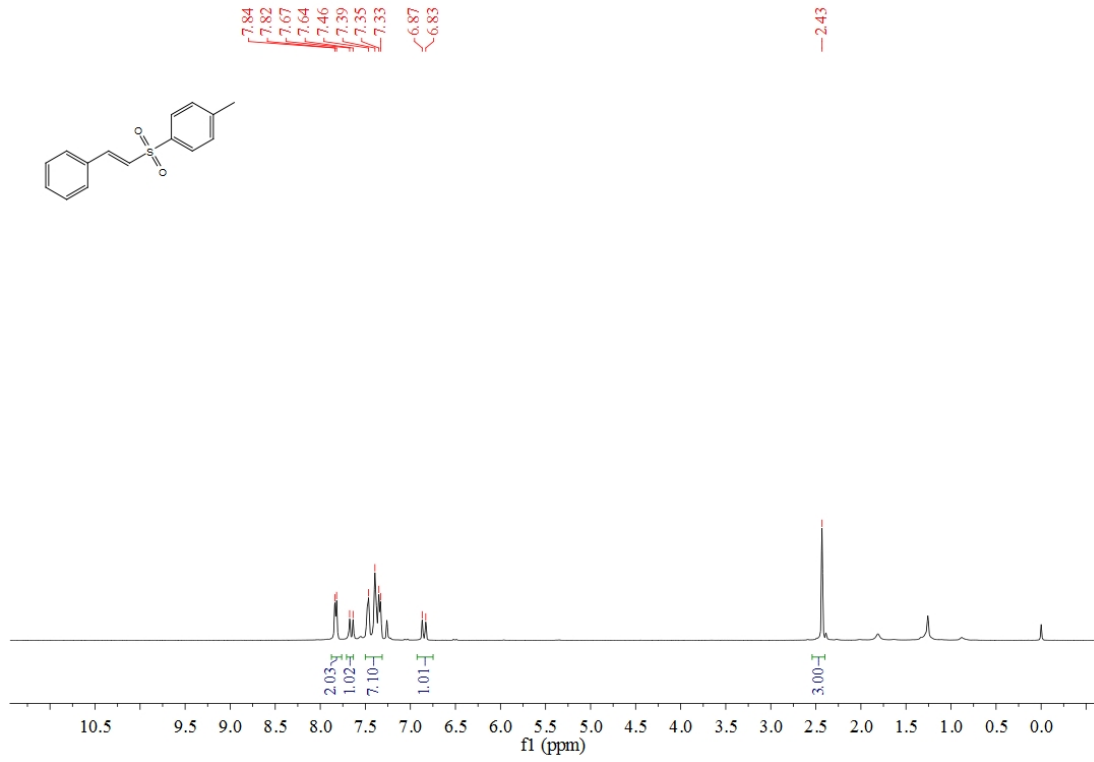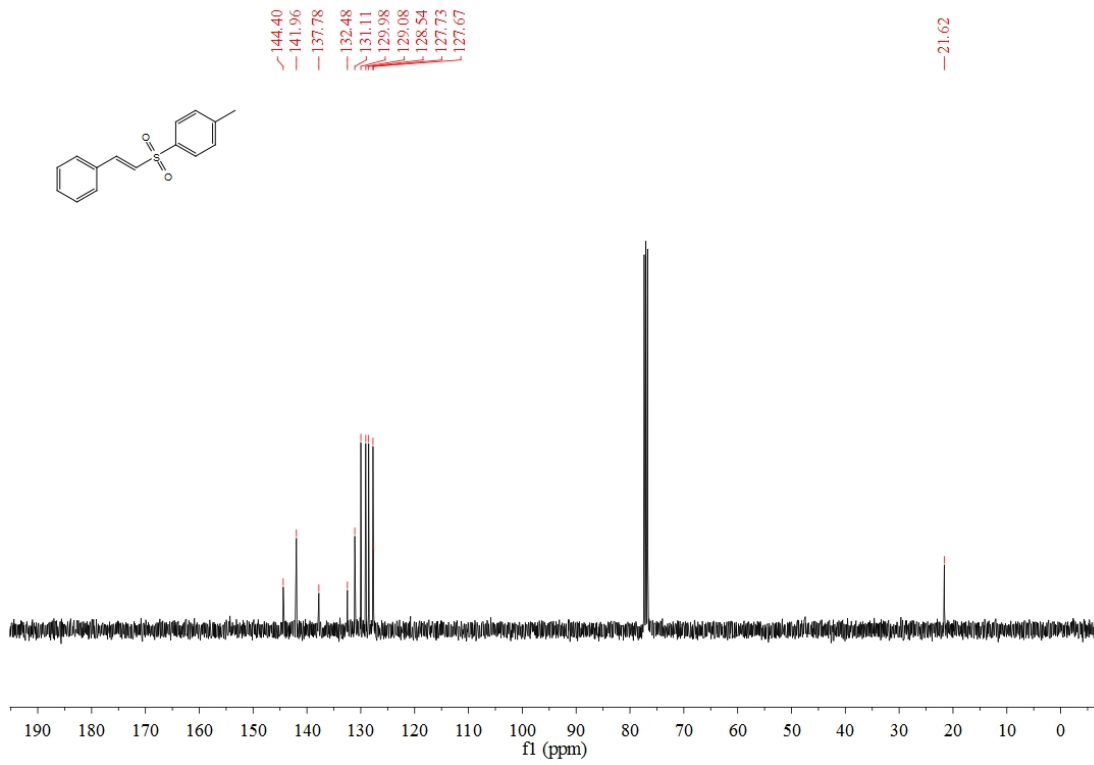

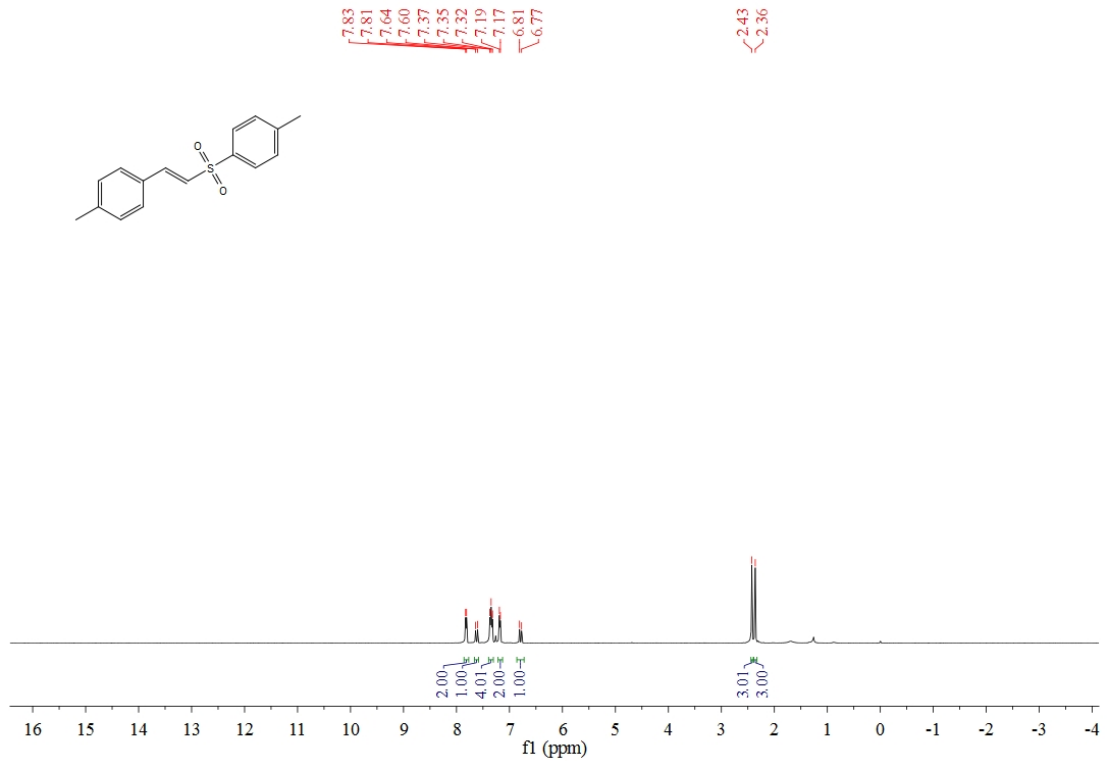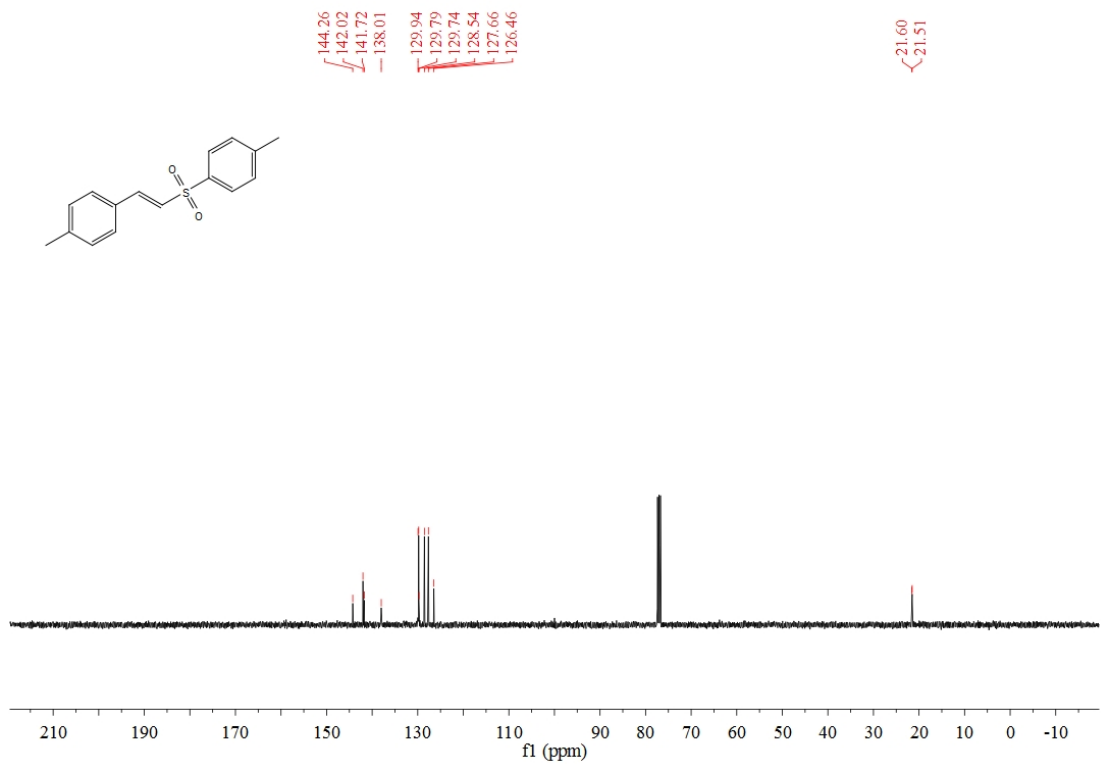

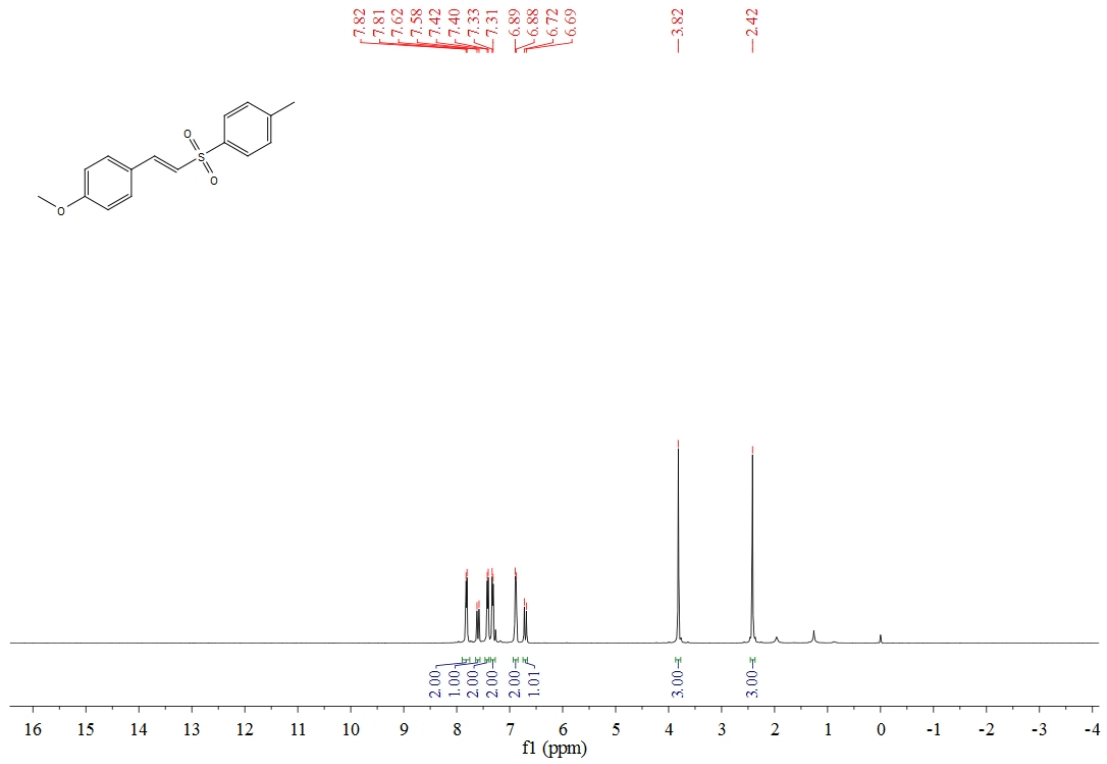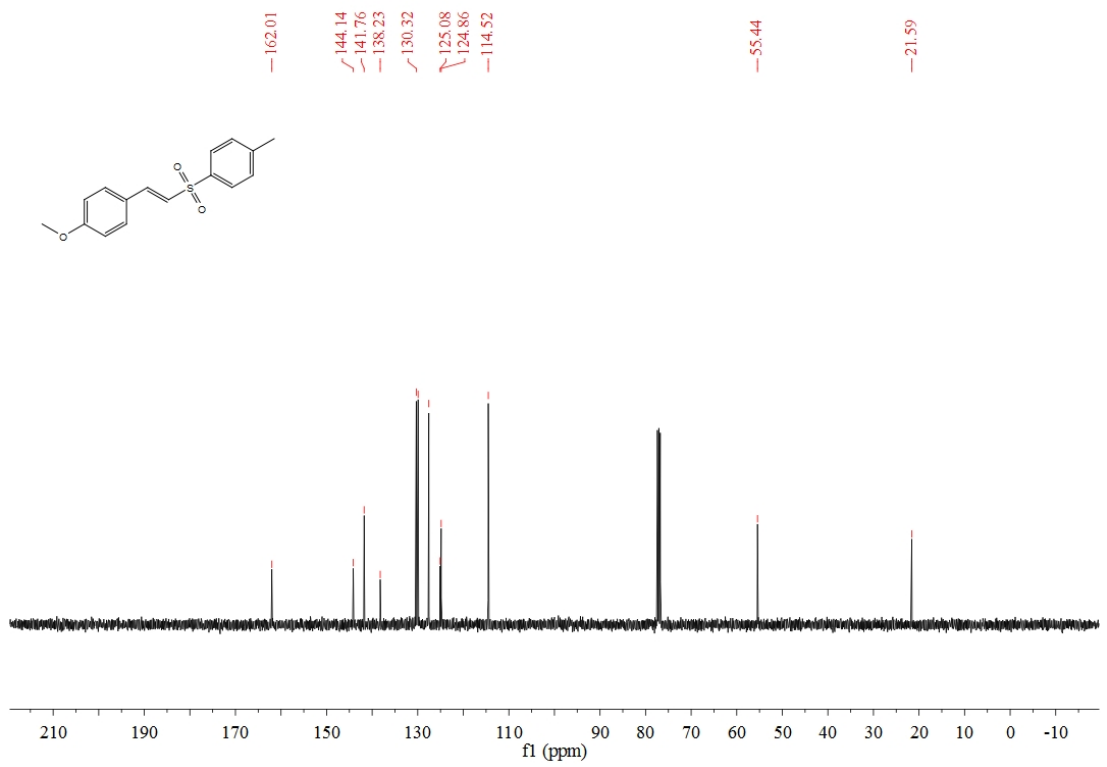

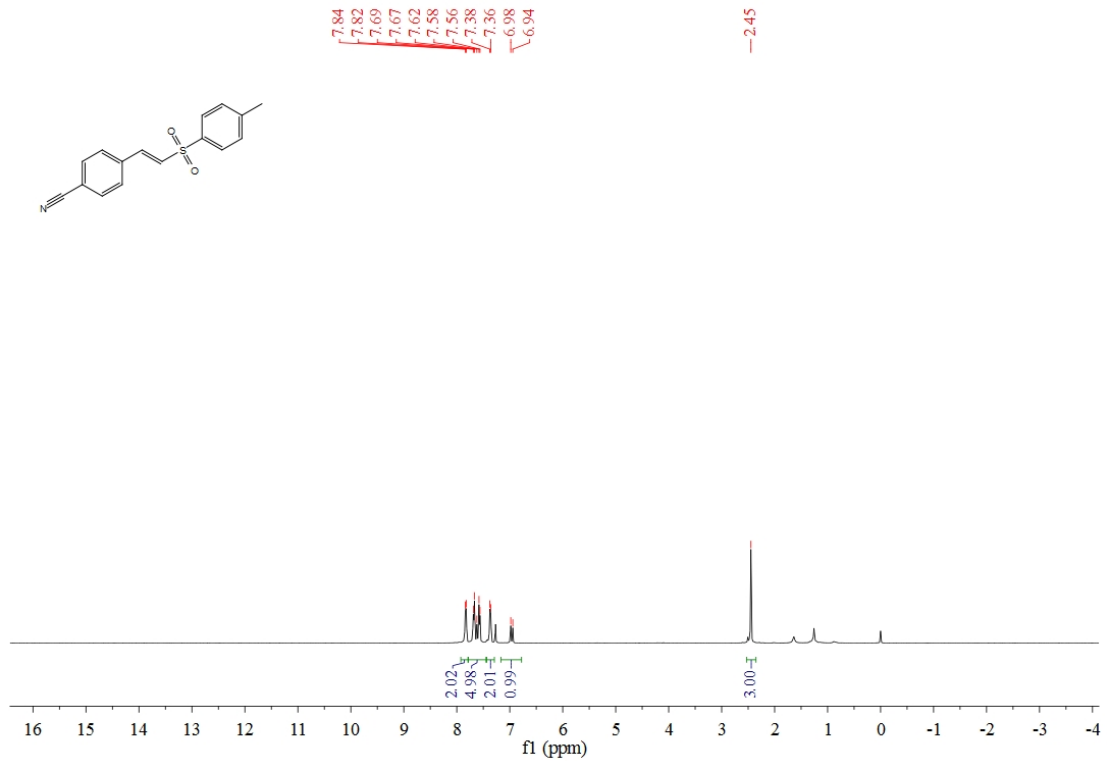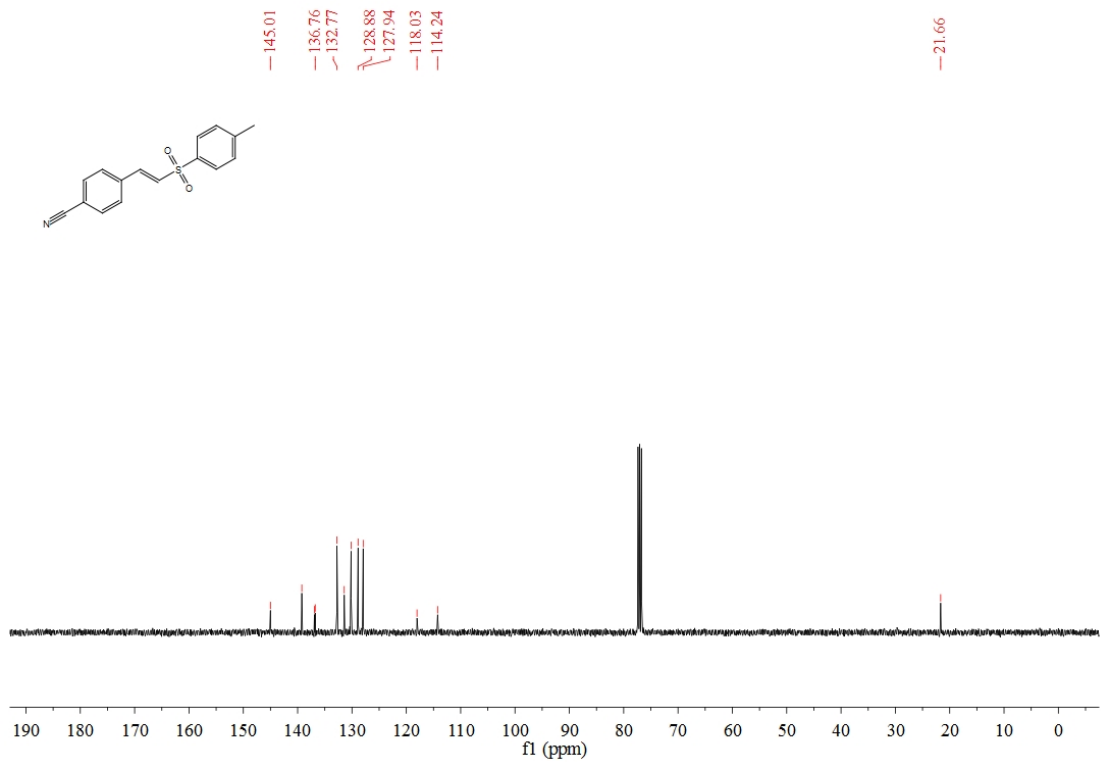

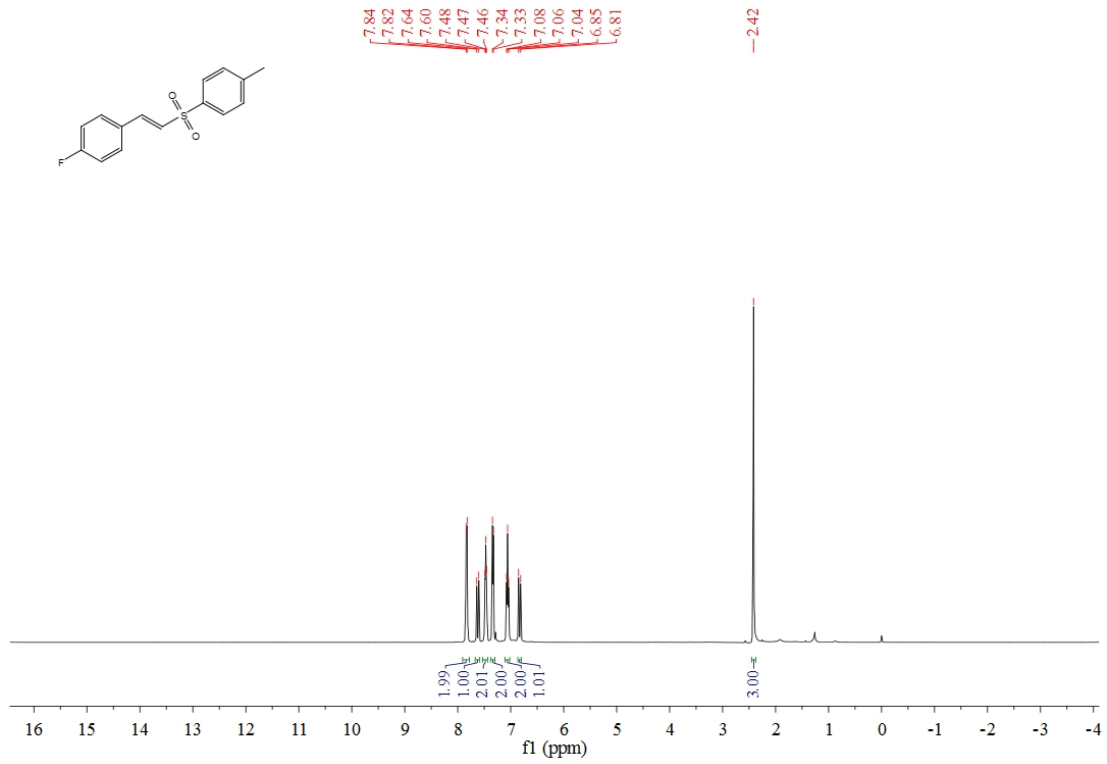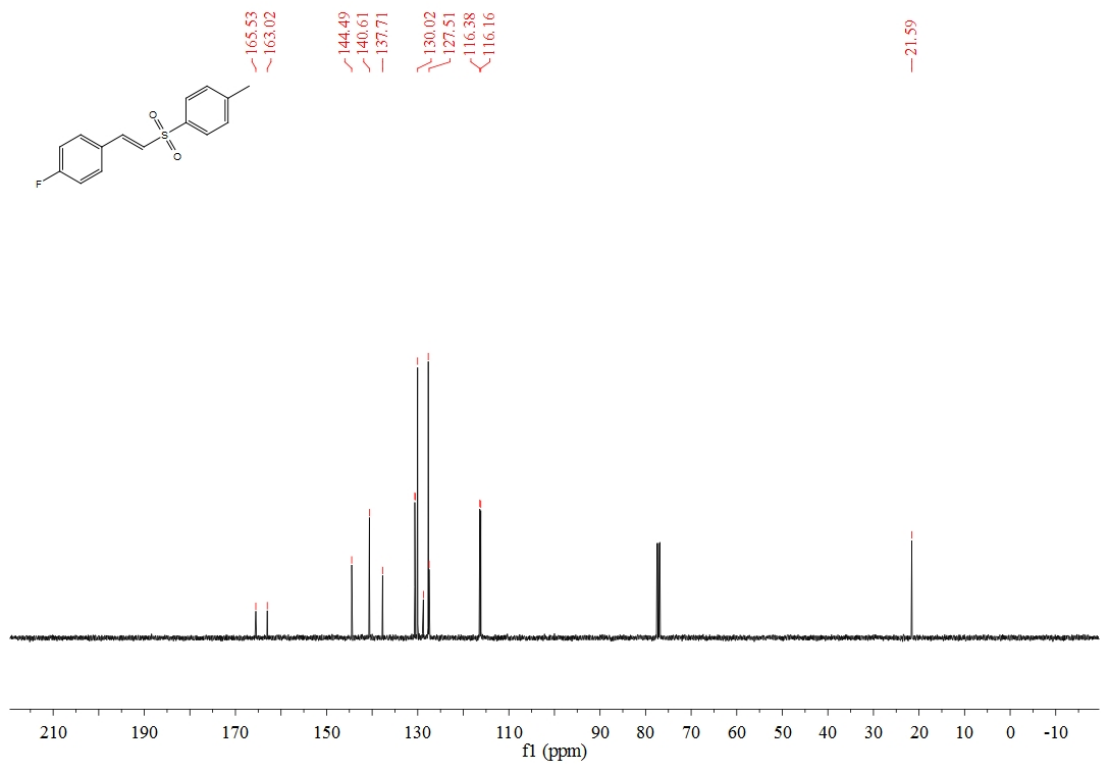

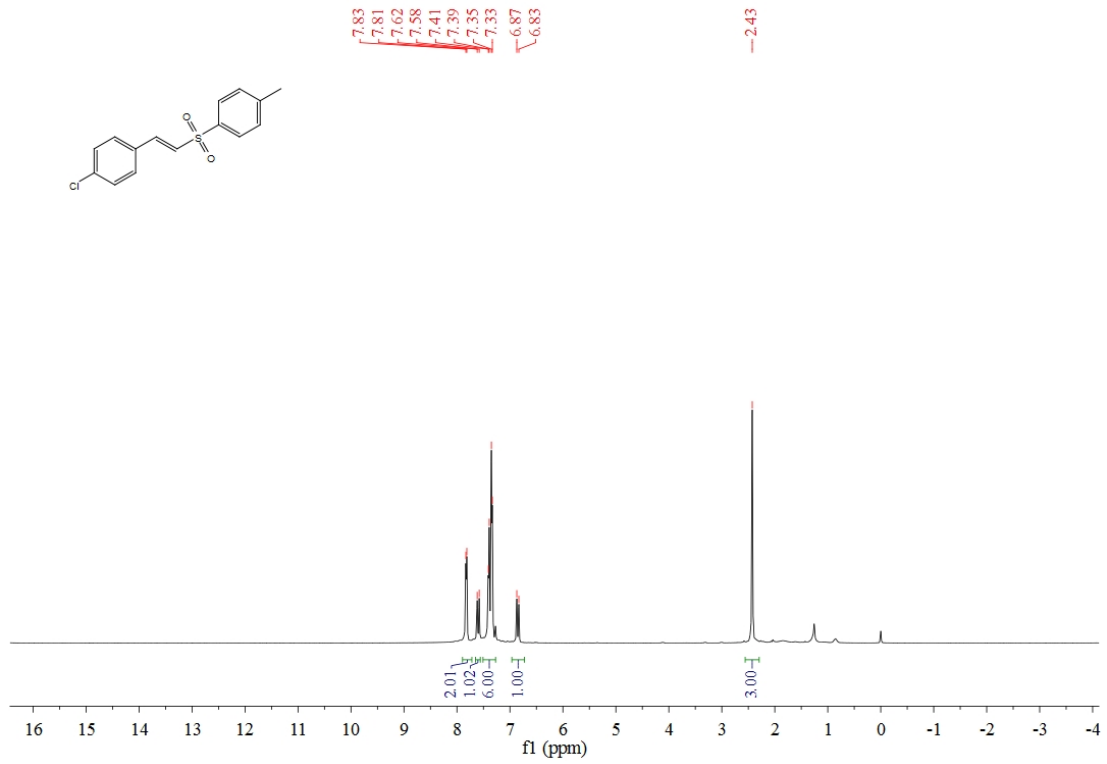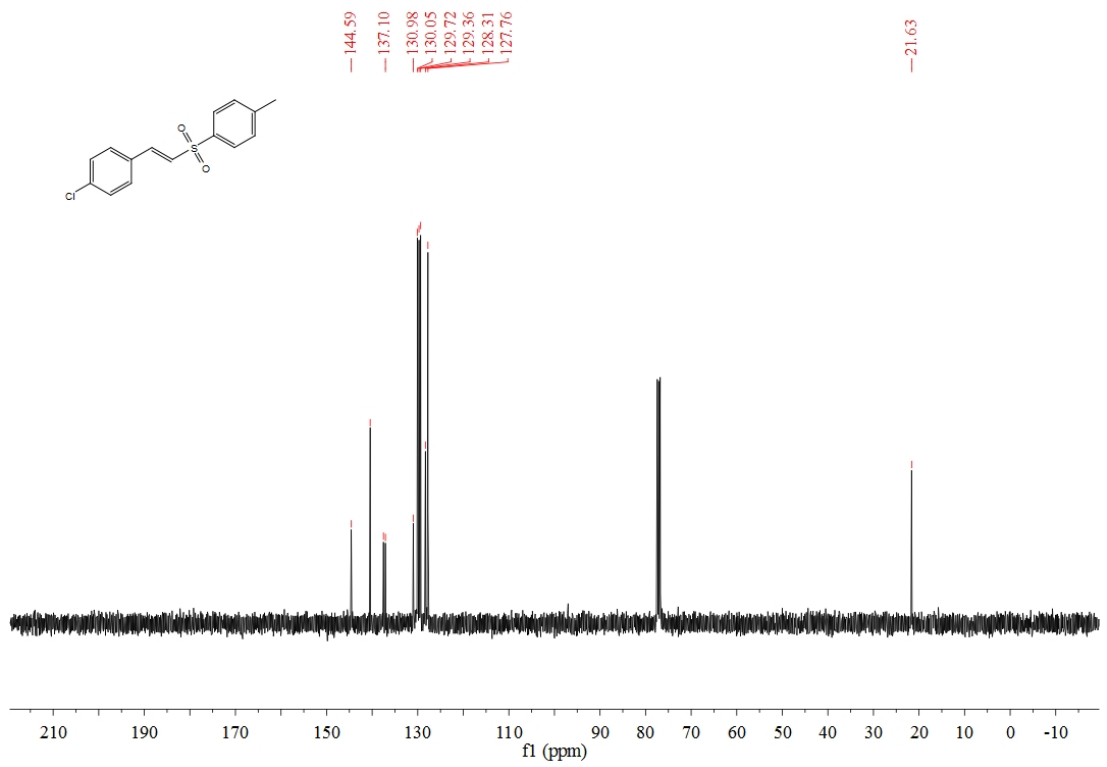

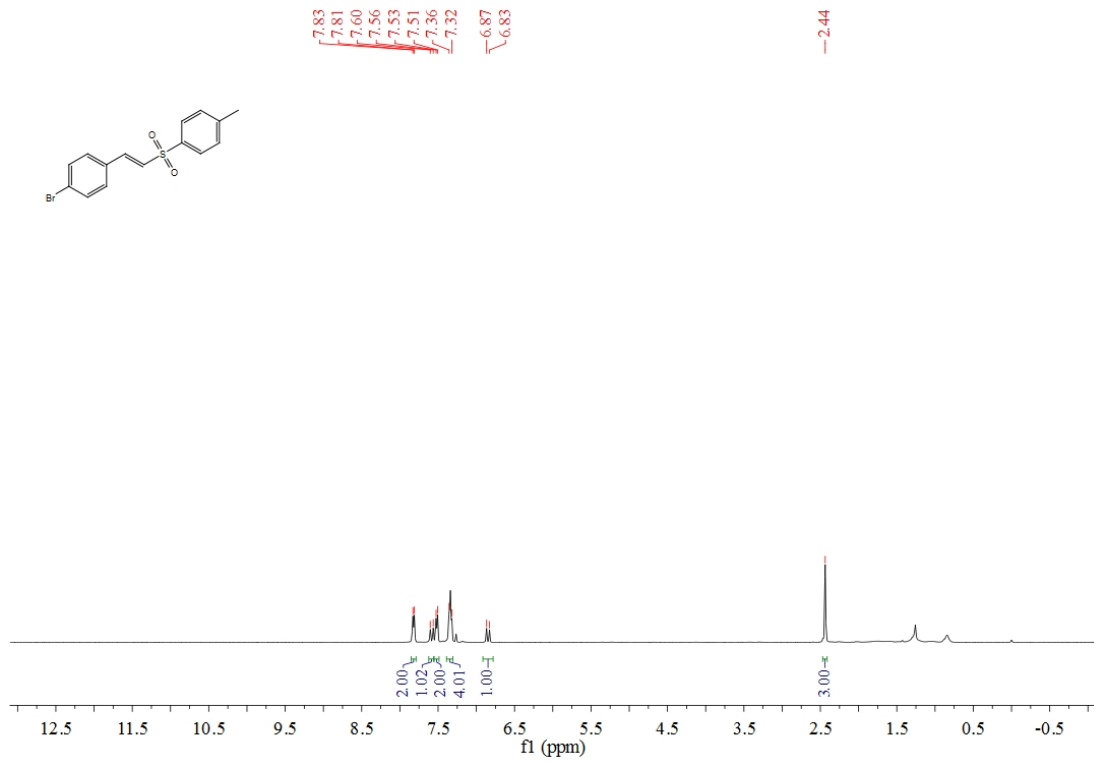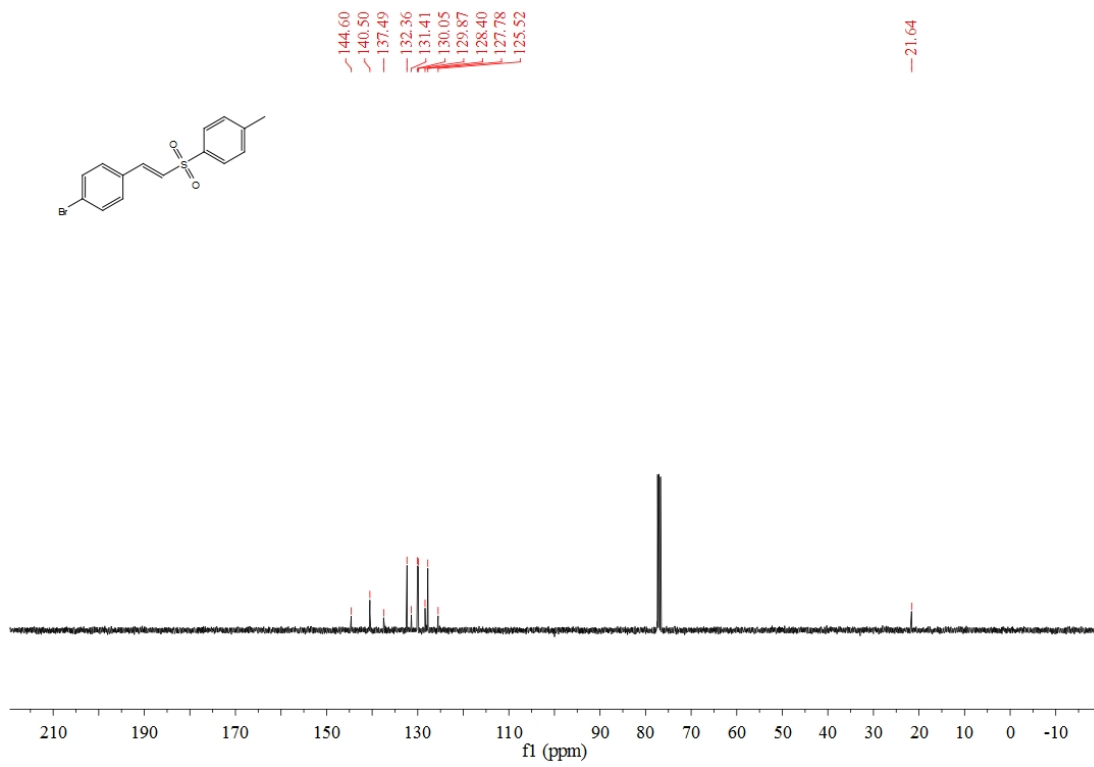

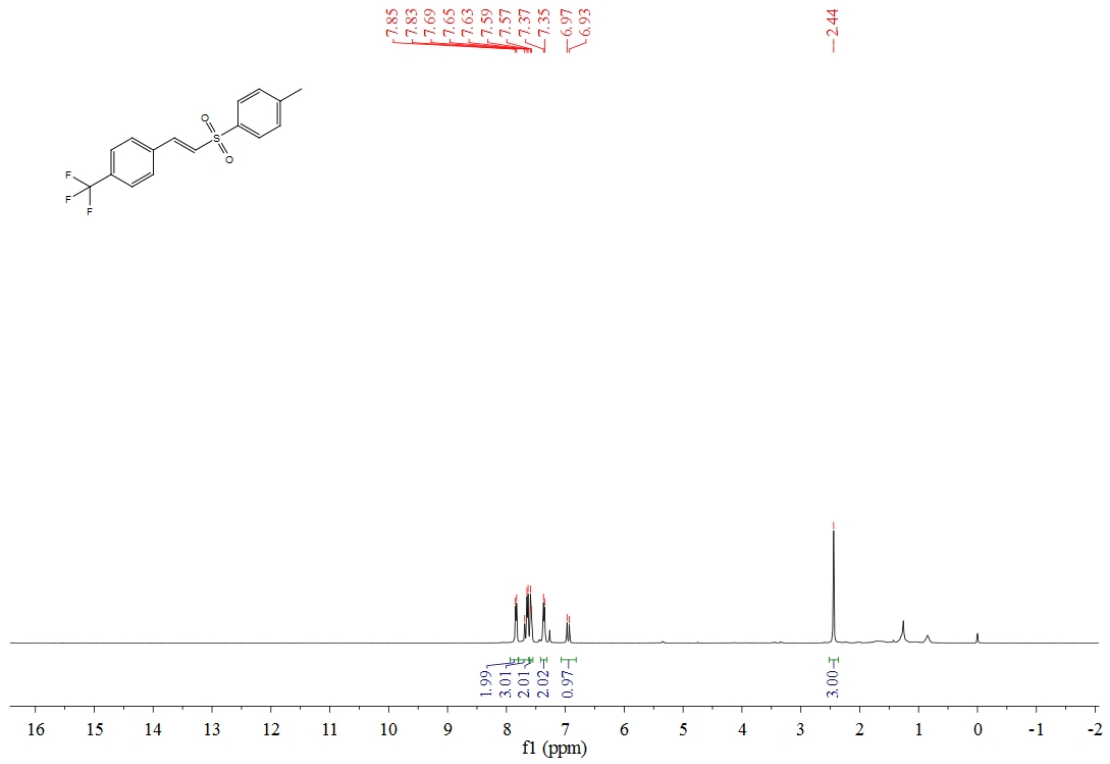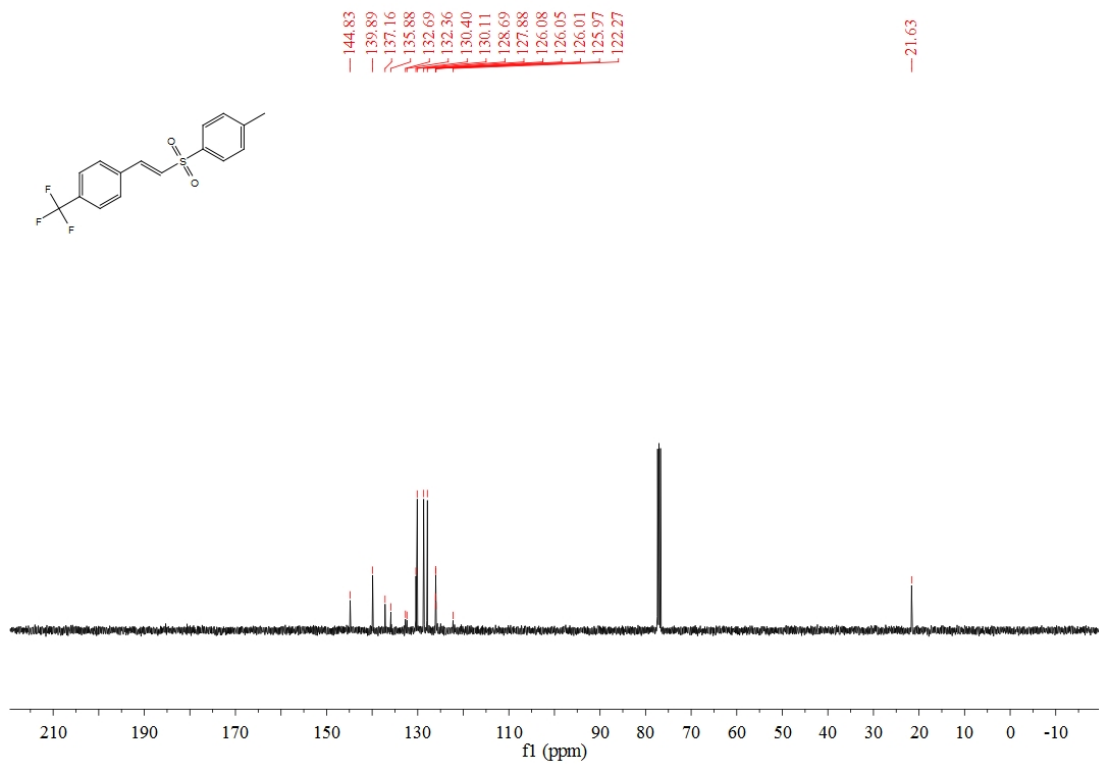



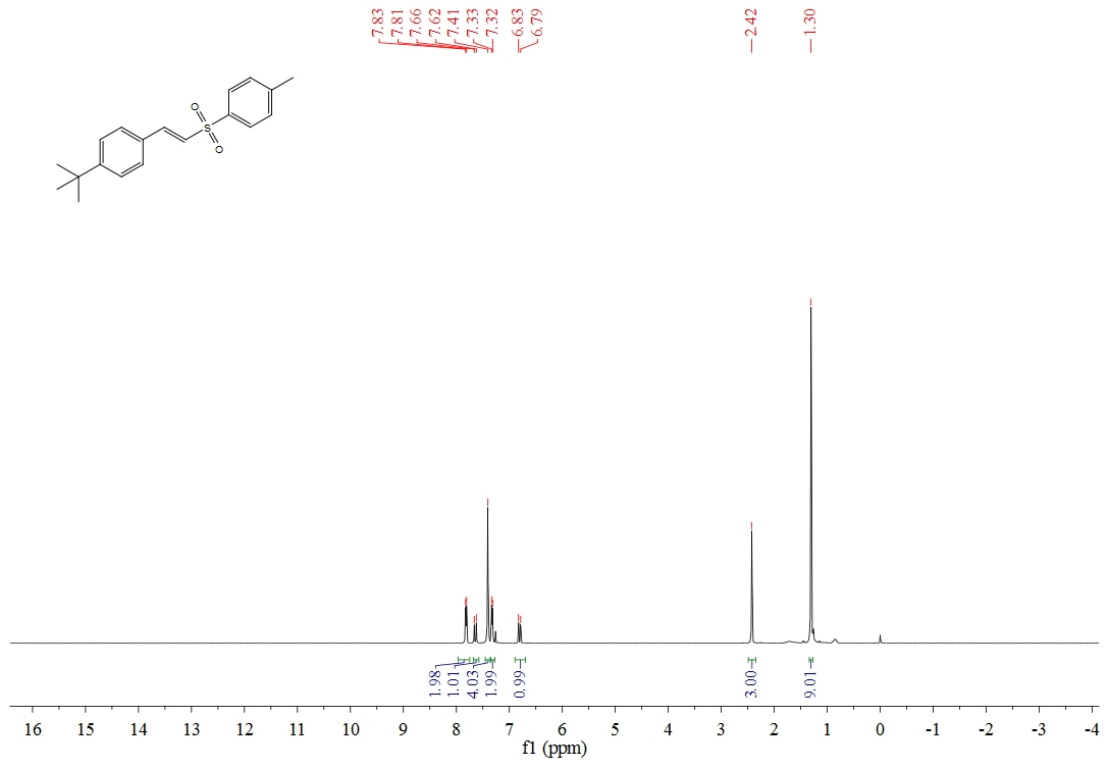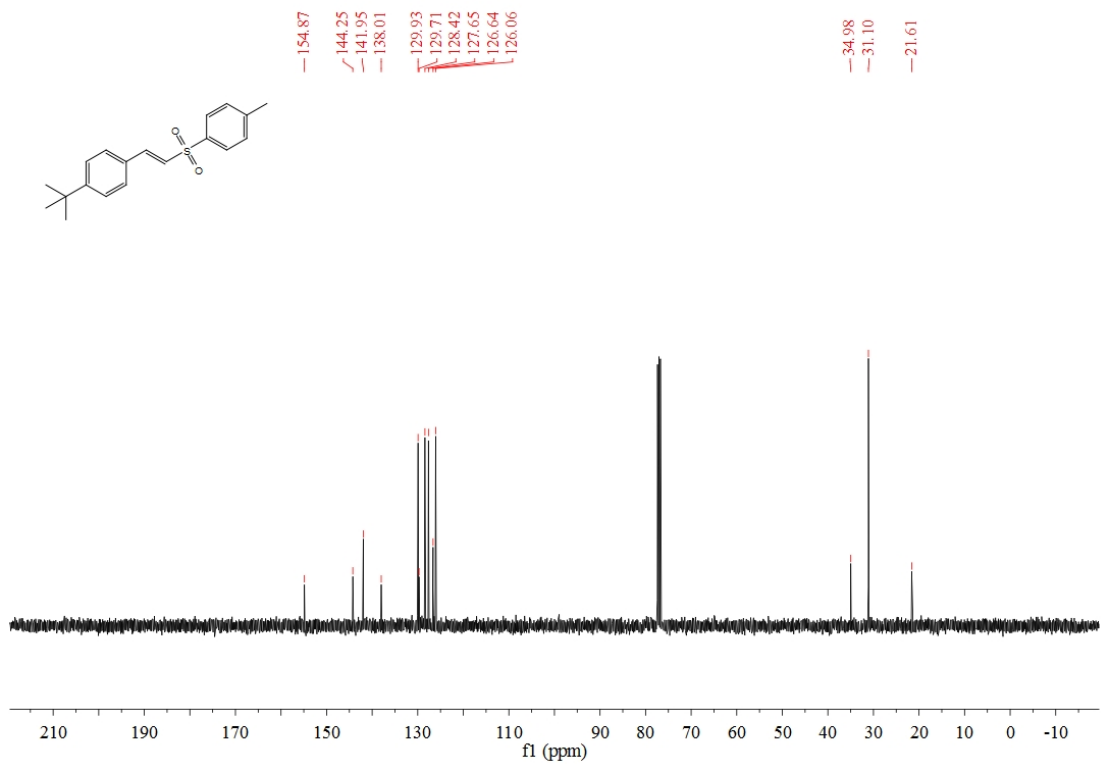

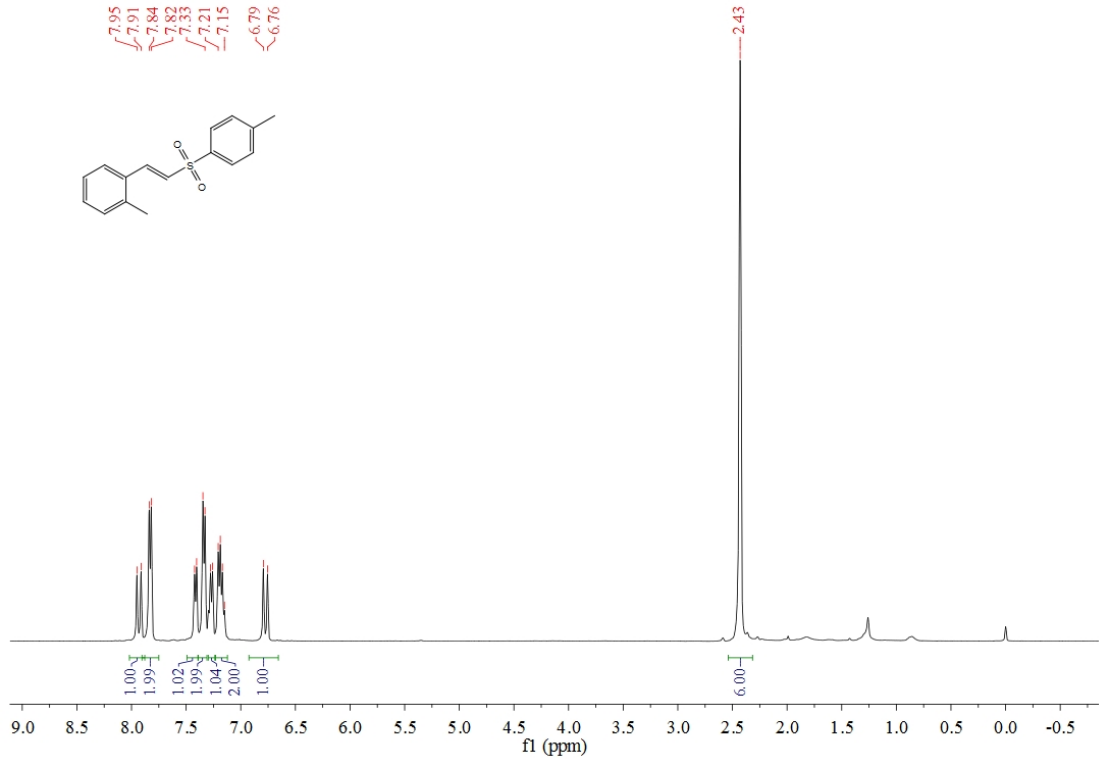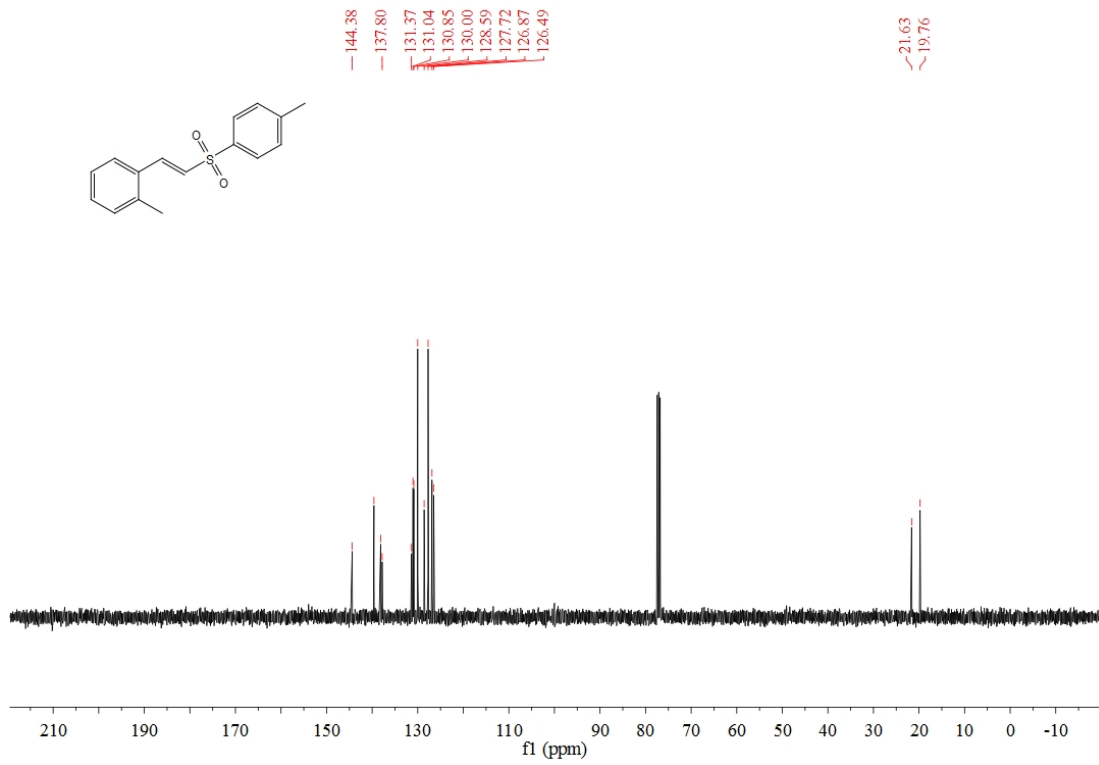

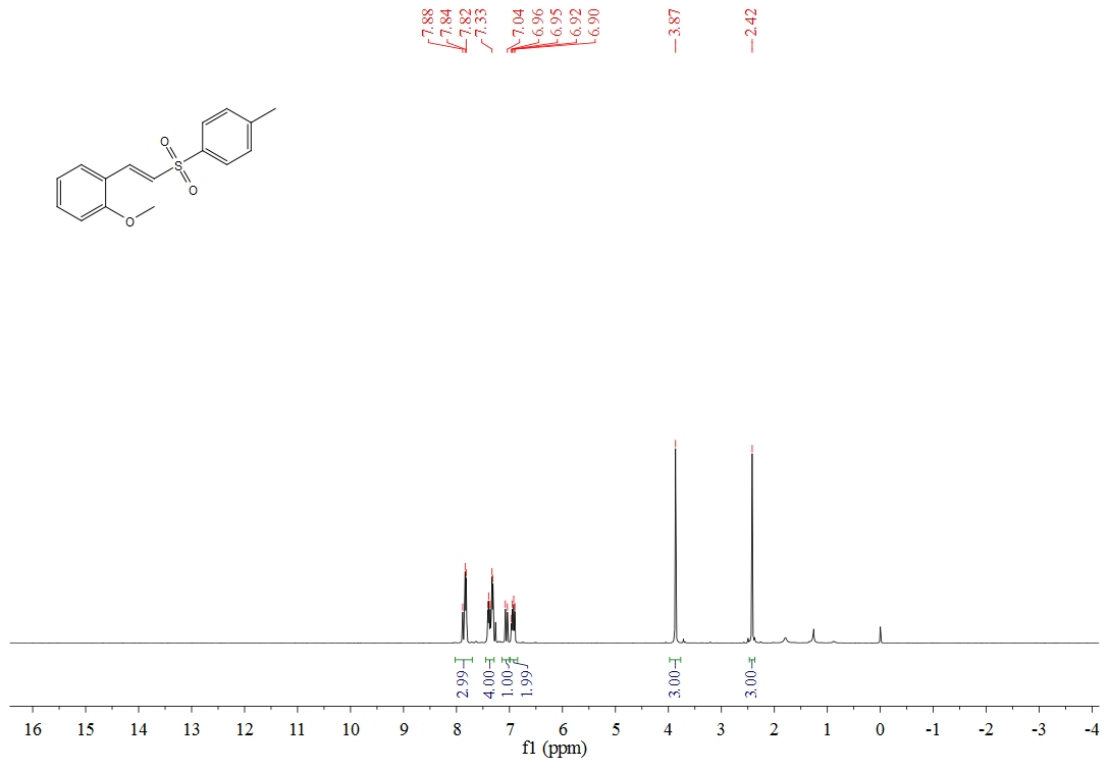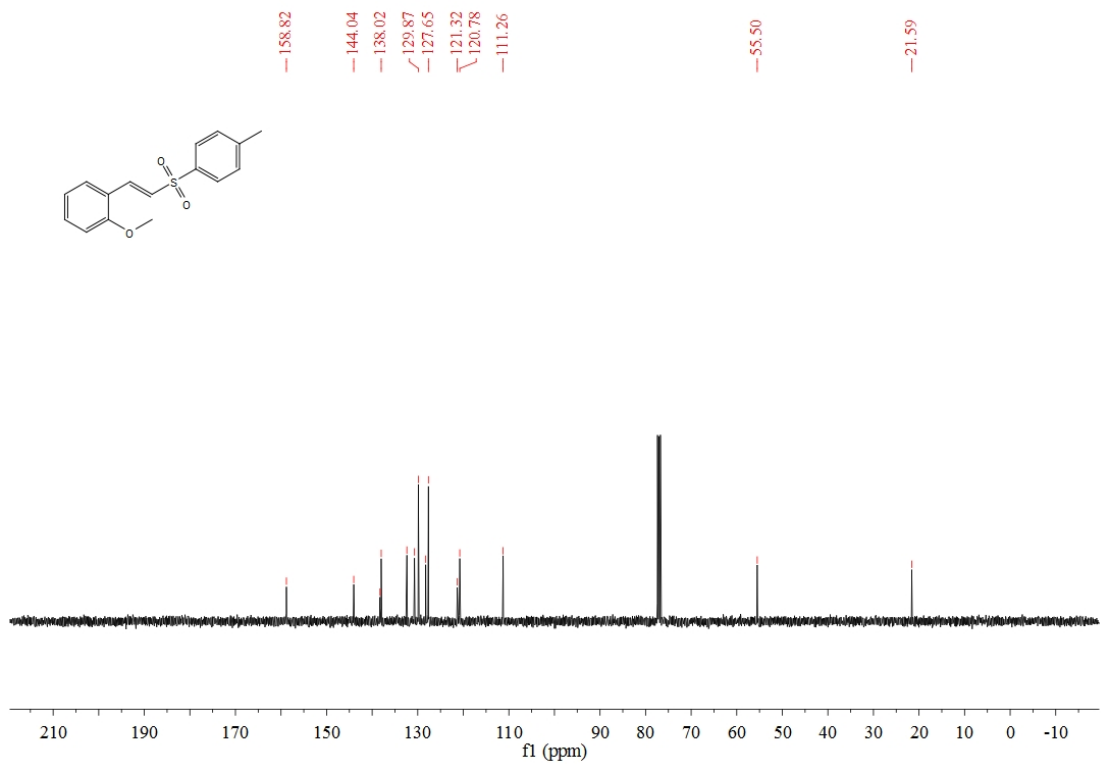

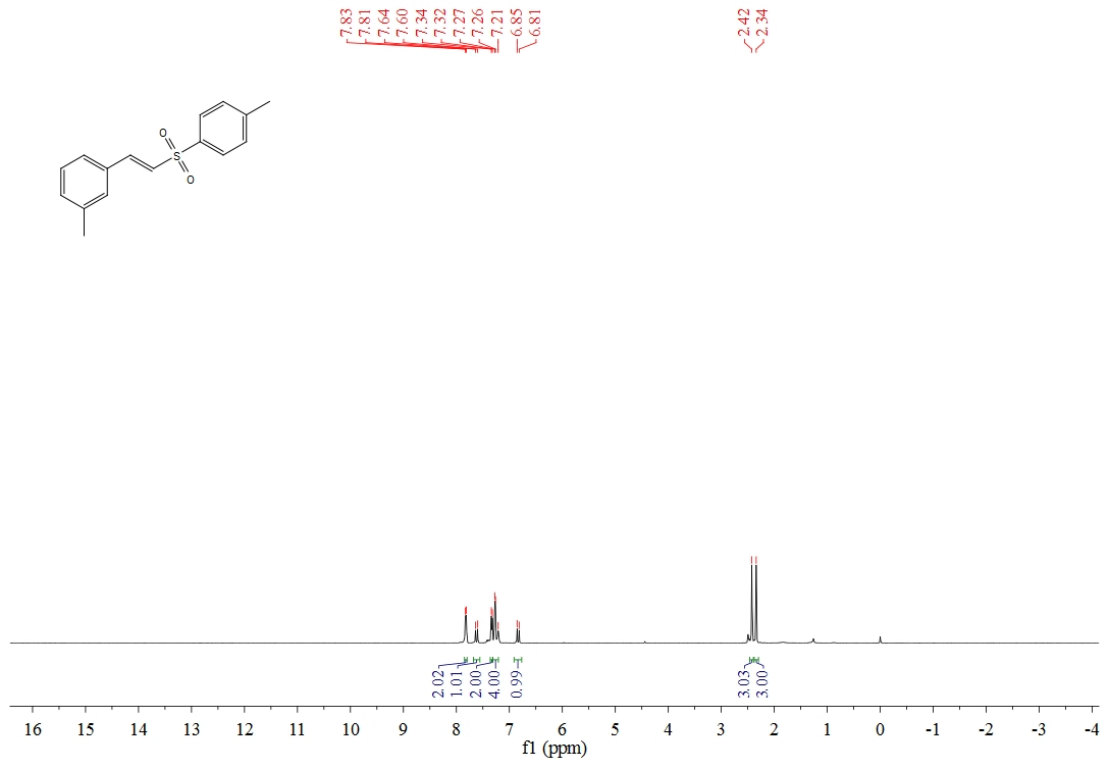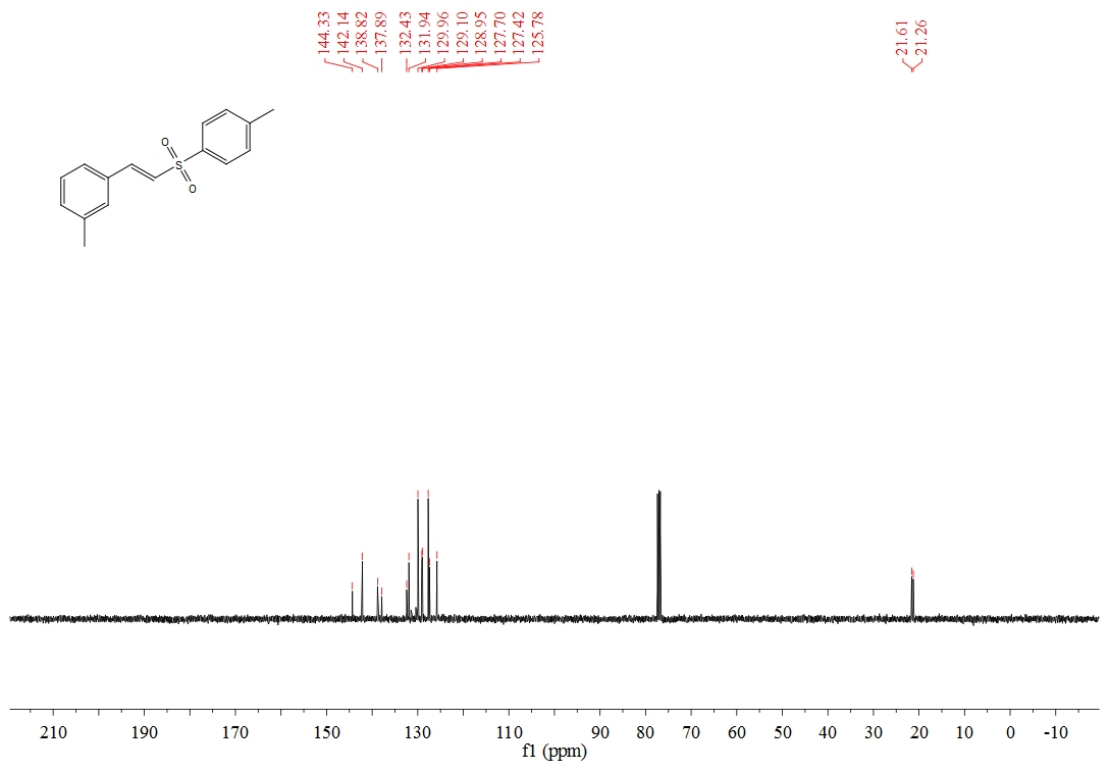

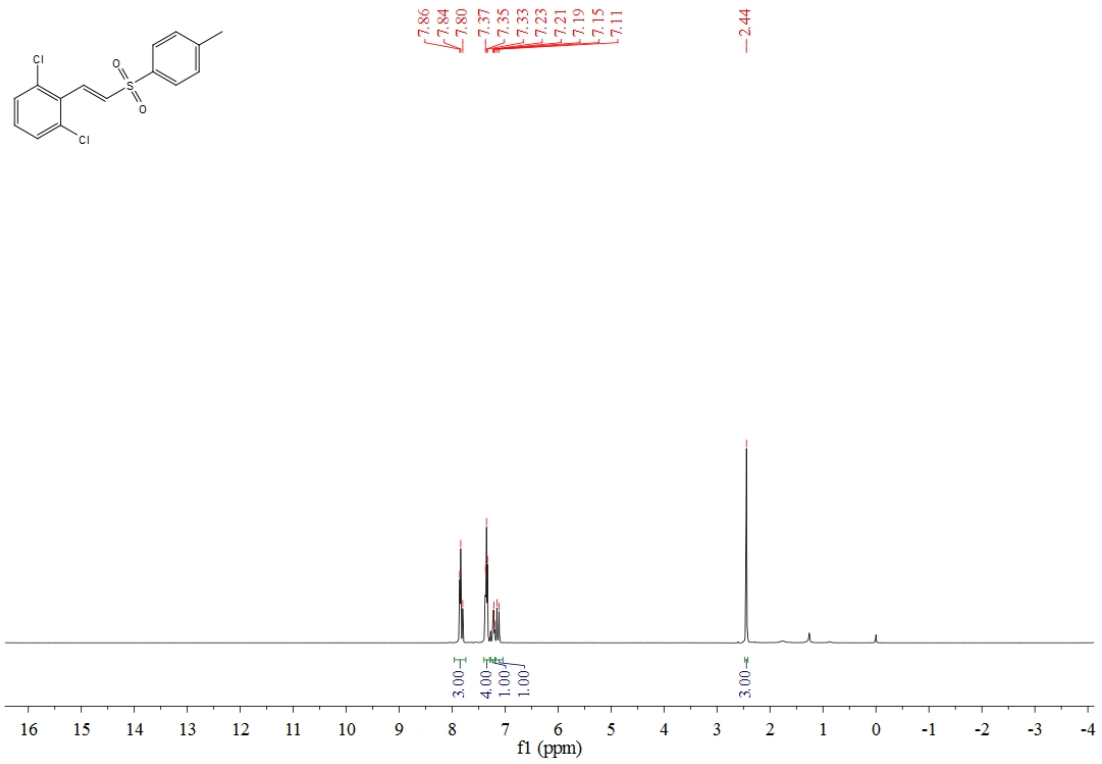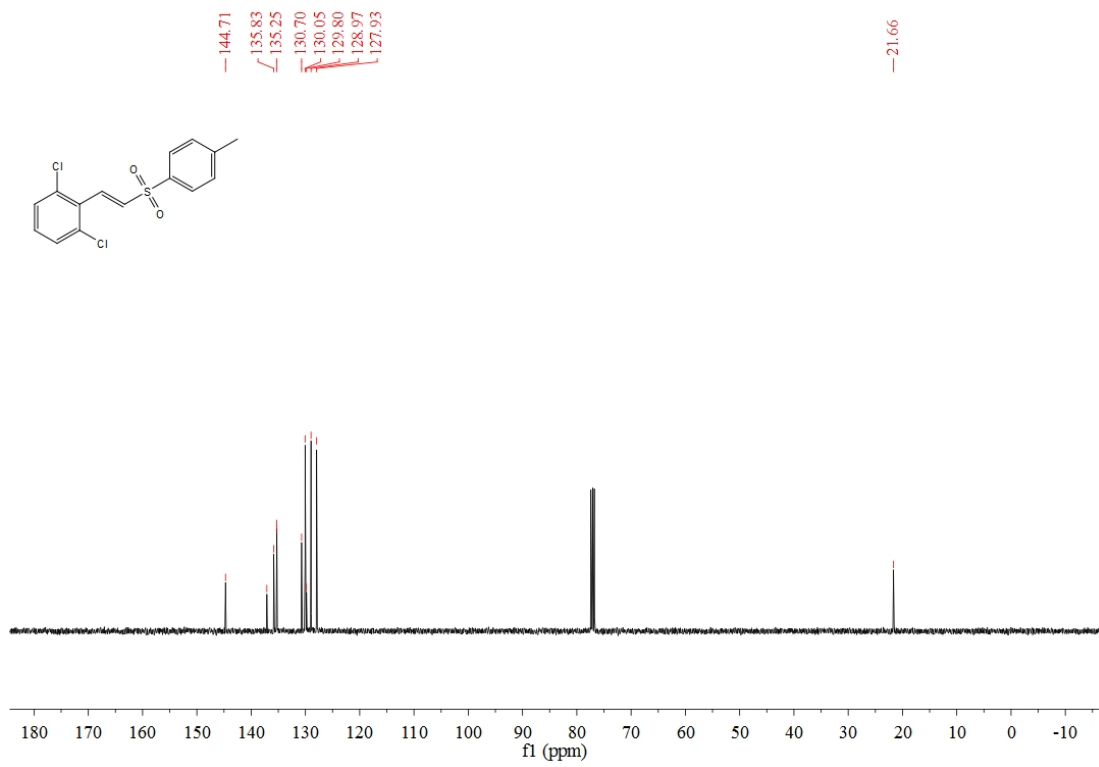

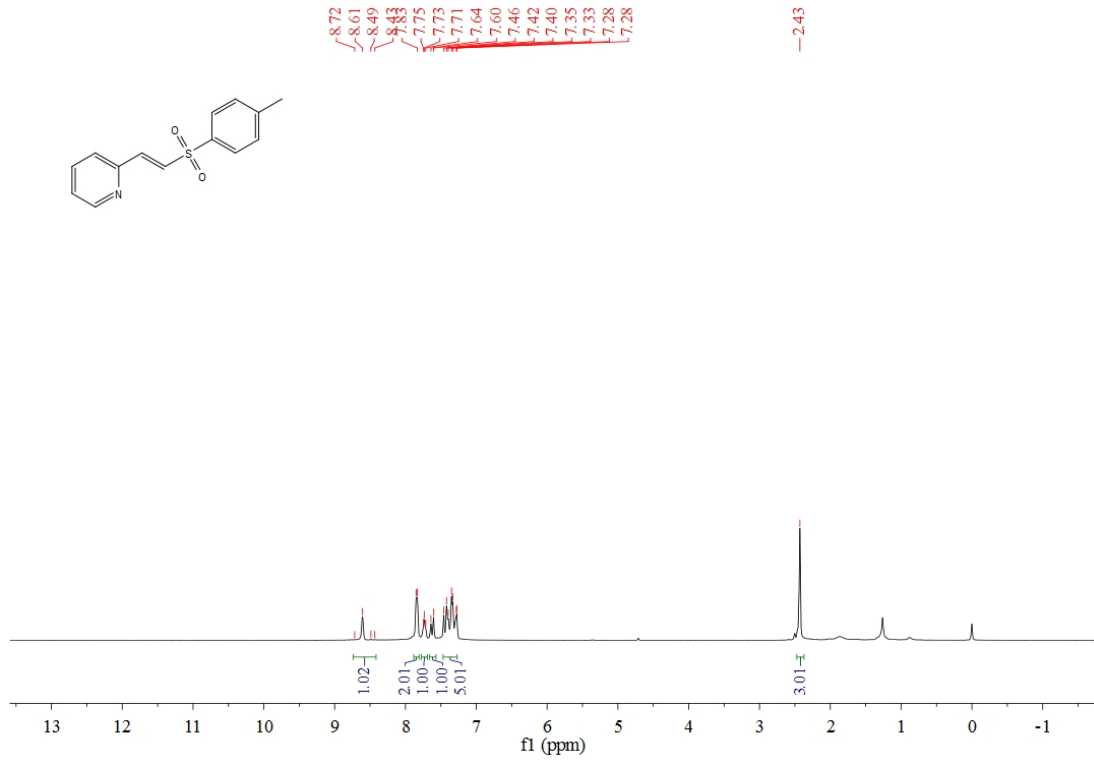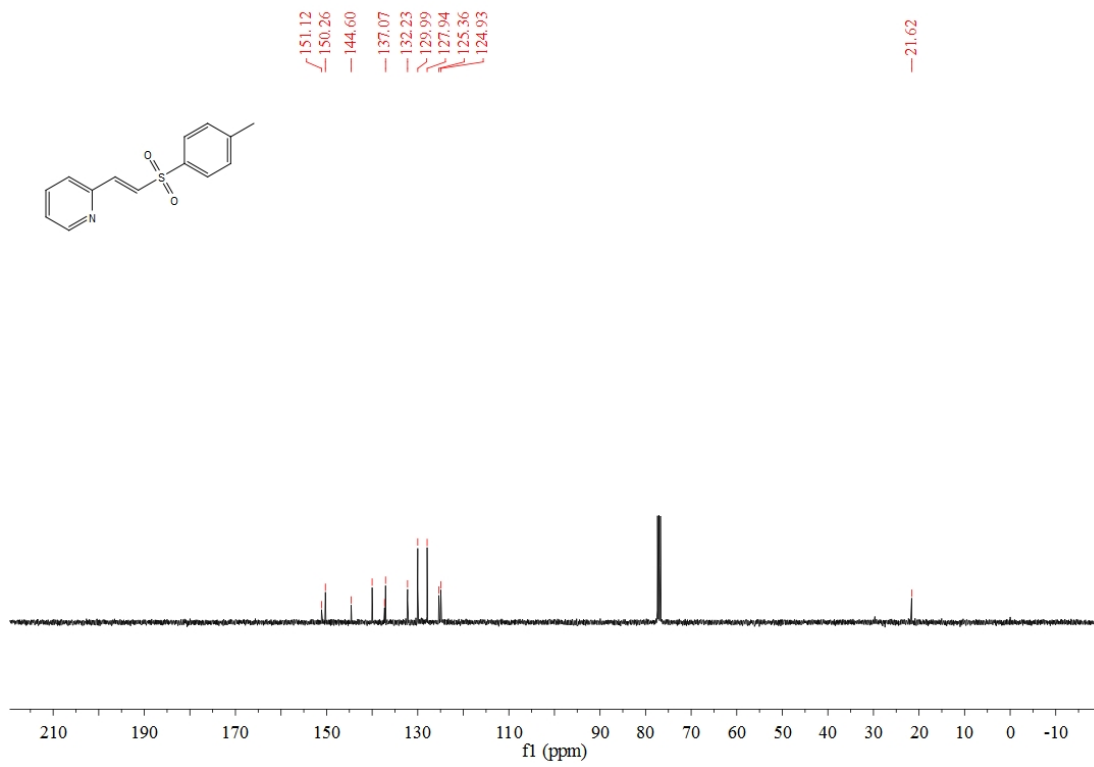

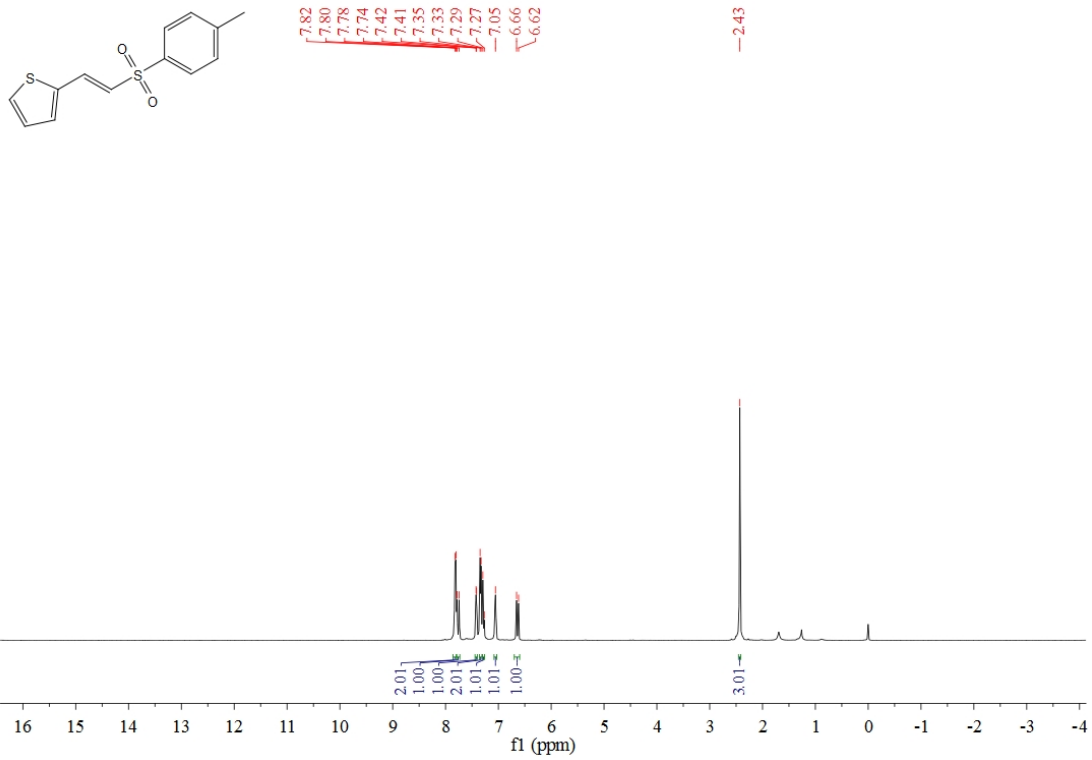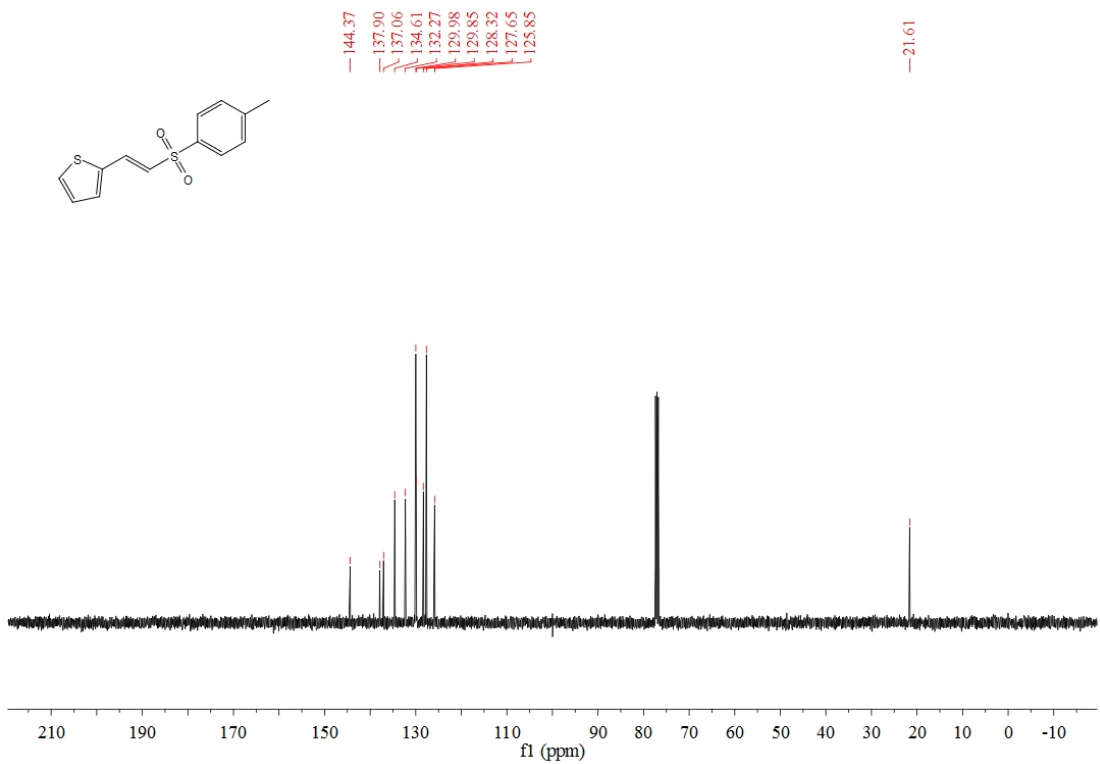

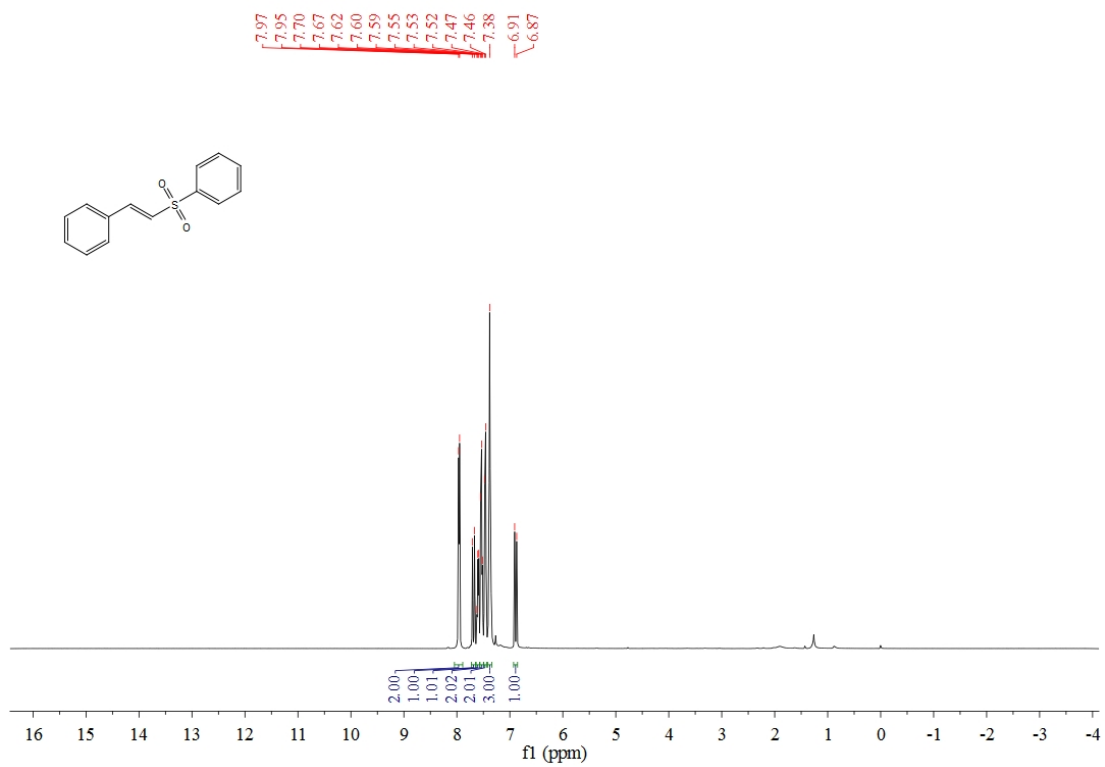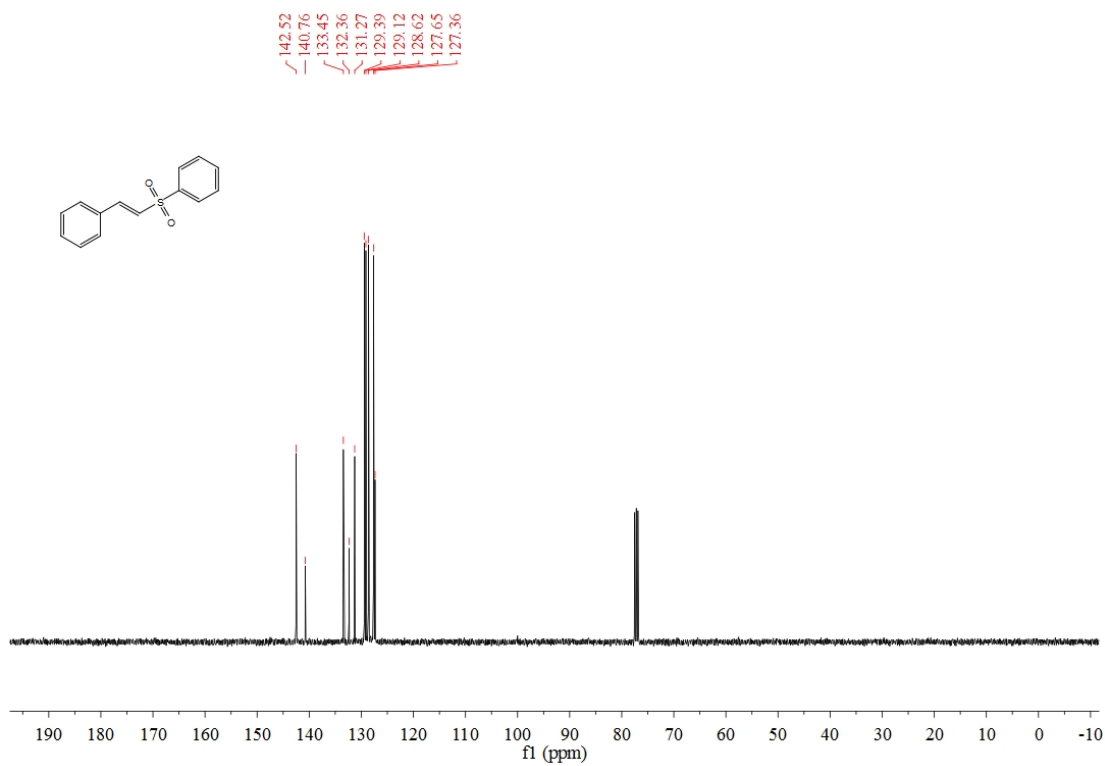



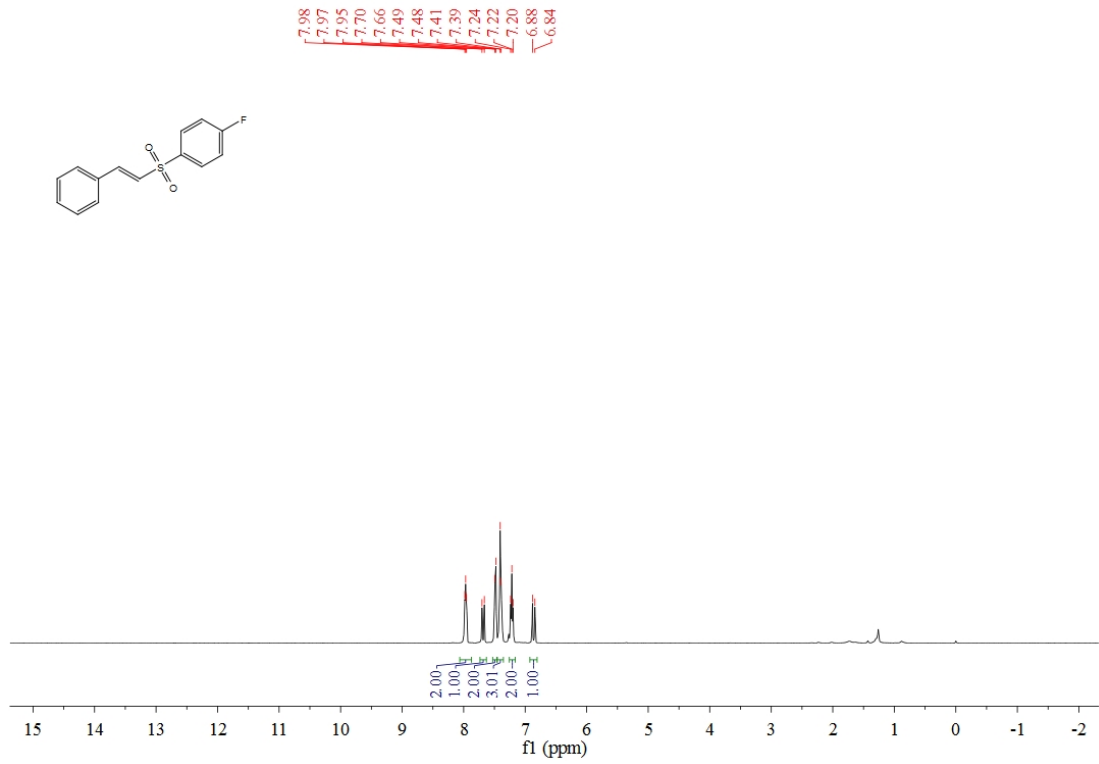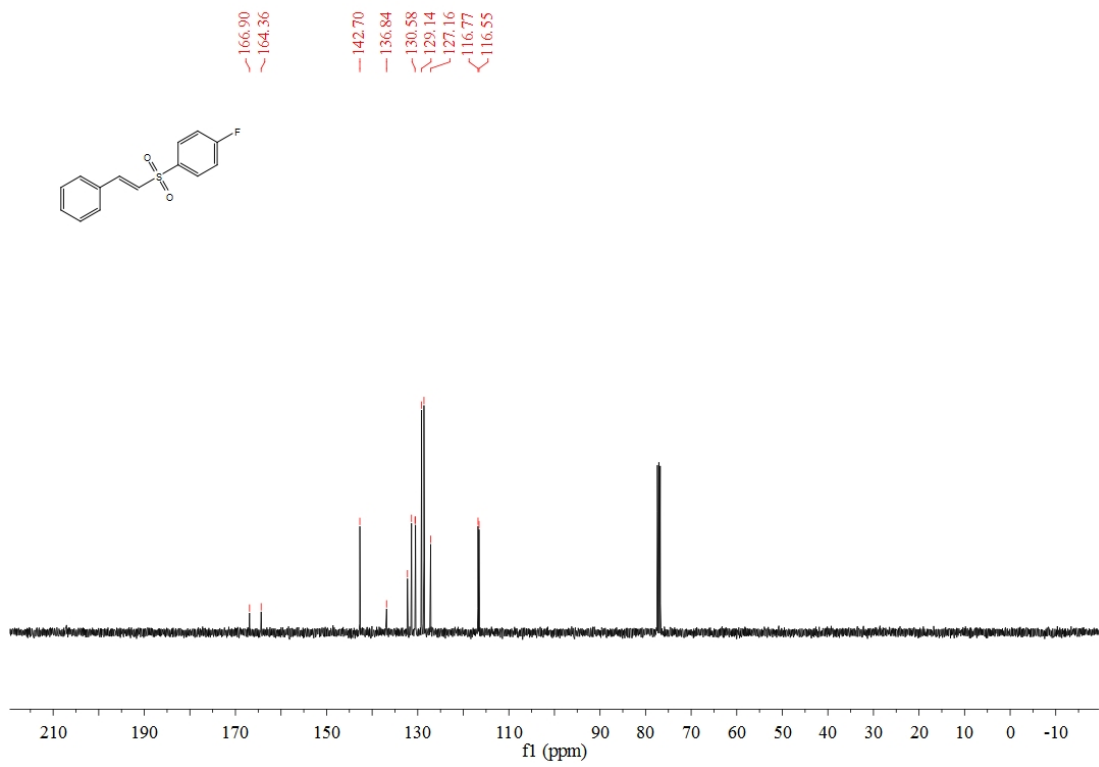

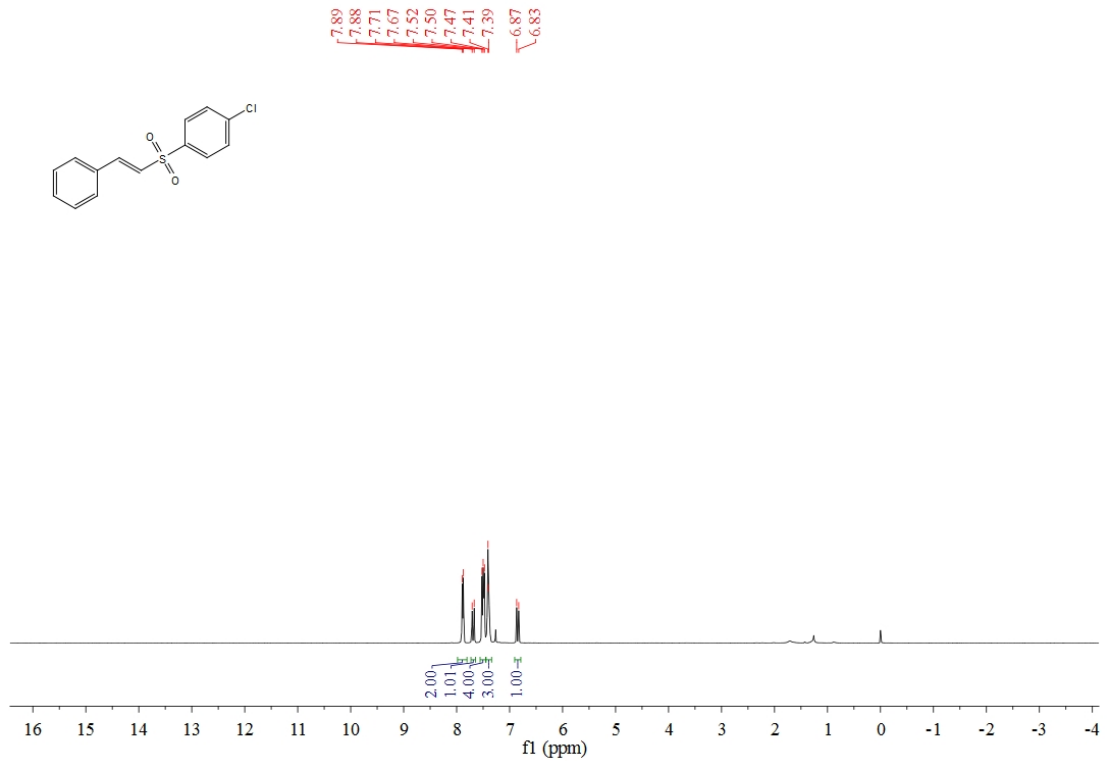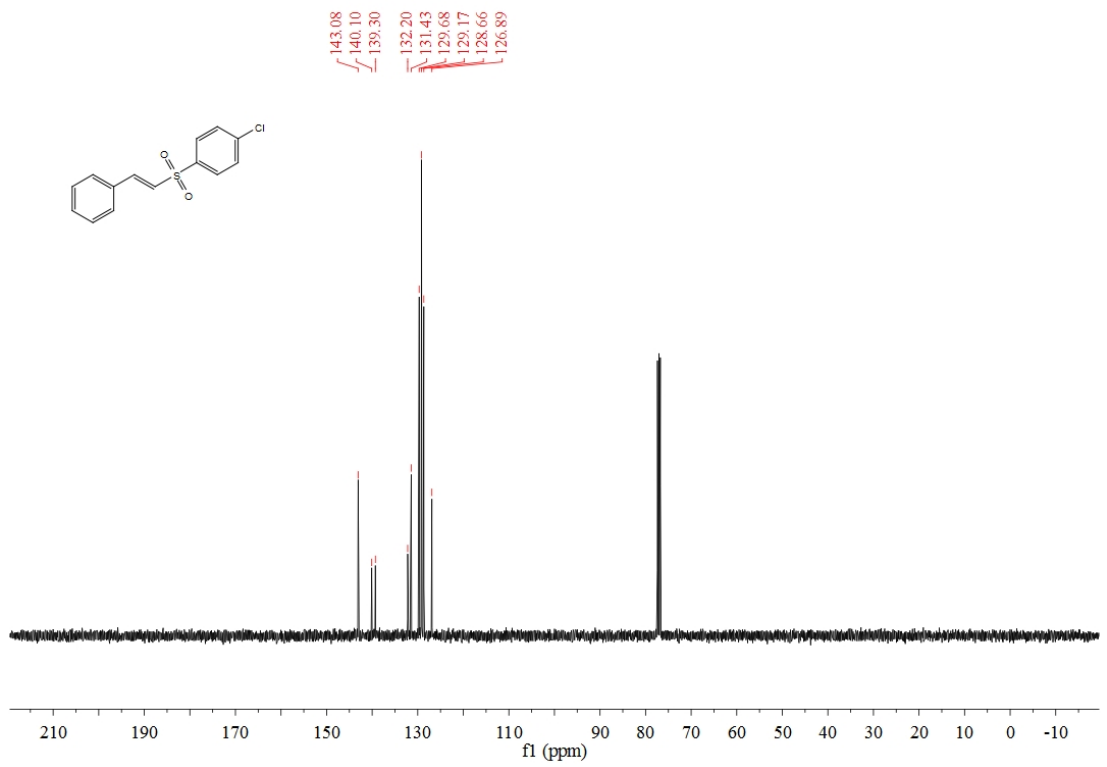

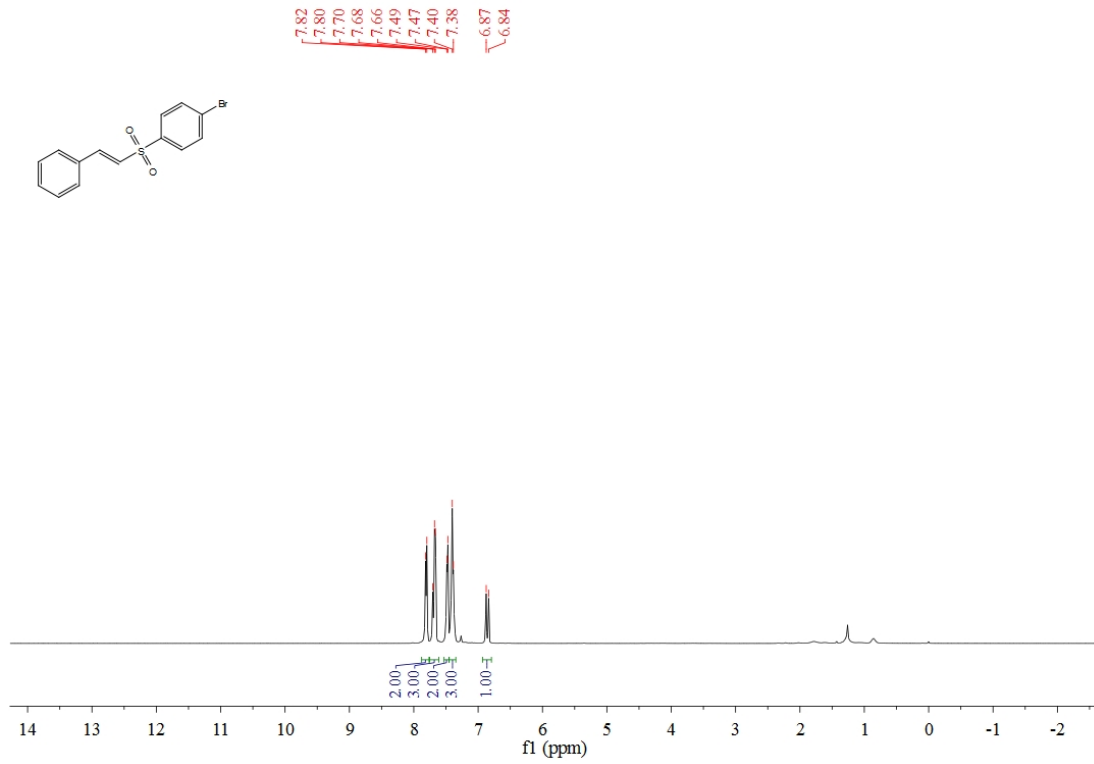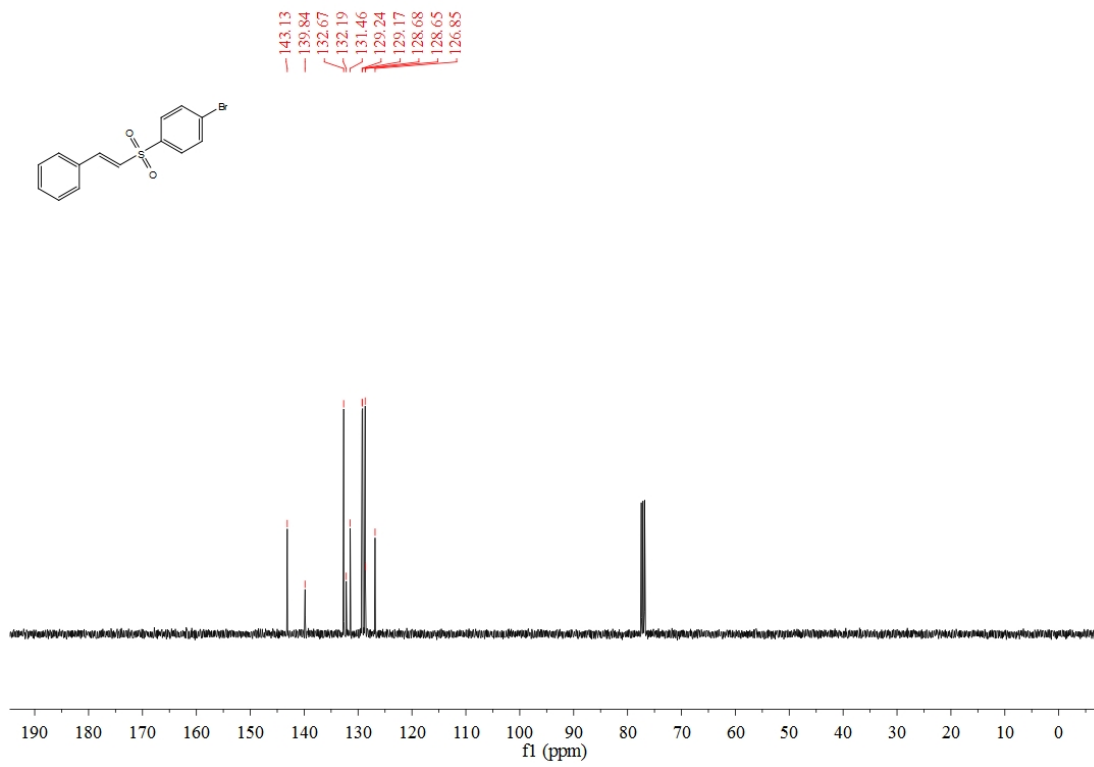

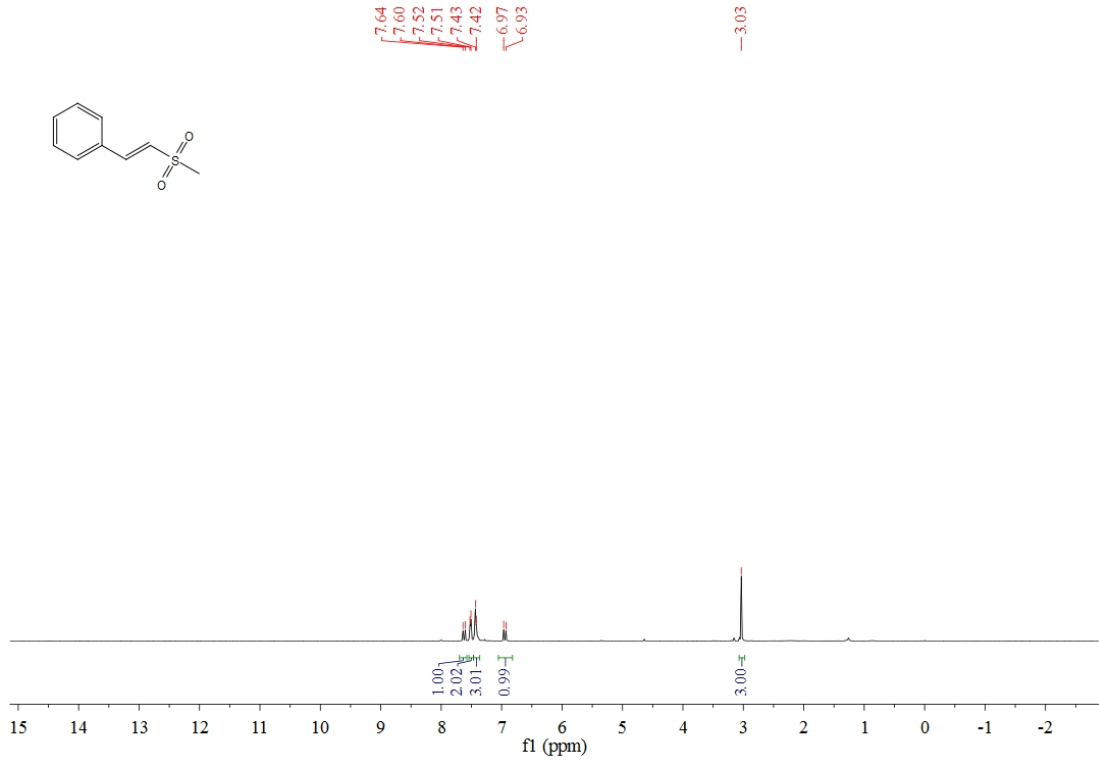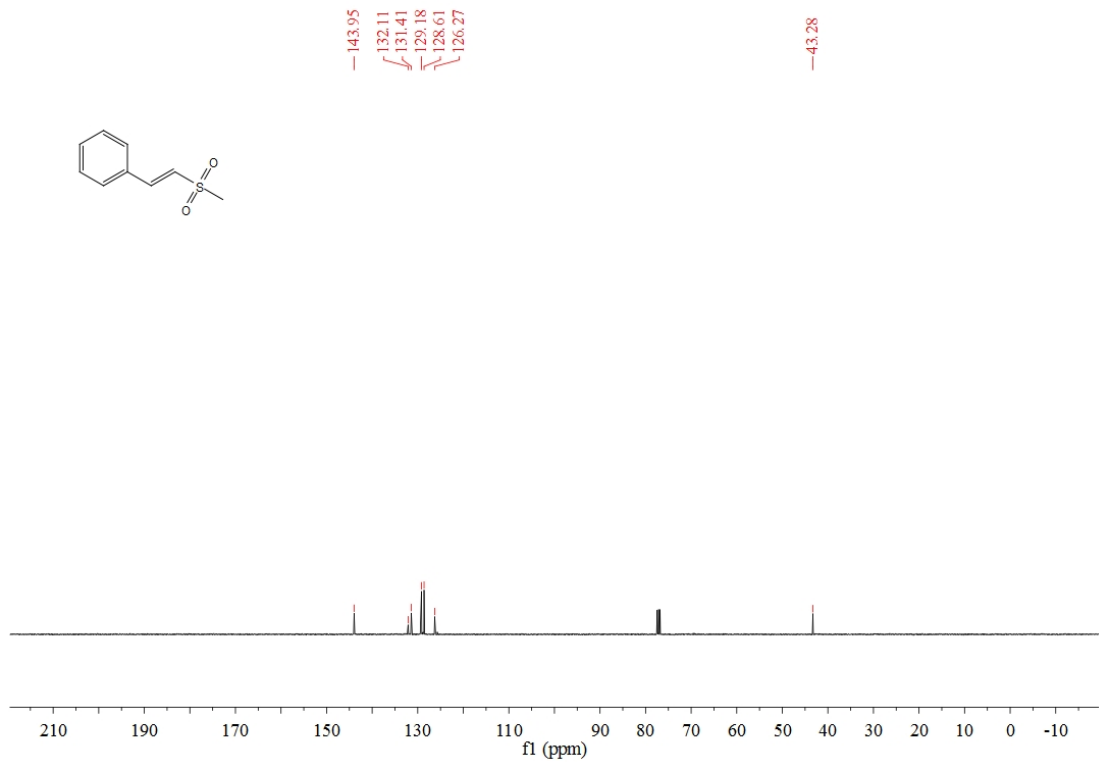

Supplement: c5ra10896a1.pdf [file c5ra10896a1.pdf]
